# Supplementary material for: Synoptic fluctuation of the Taiwan Warm Current in winter on the East China Sea shelf
Source: Copernicus journal article supplement (doi:10.5194/os-2016-70), 2016-09-23
Supplement: Supplementary file [file os-2016-70-AC1-supplement.pdf]

## Synoptic fluctuation of the Taiwan Warm Current in winter on the East China Sea shelf

Jiliang Xuan<sup>1</sup>, Daji Huang<sup>1, 2</sup>, Thomas Pohlmann<sup>3</sup>, Jian Su<sup>3</sup>, Bernhard Mayer<sup>3</sup>, Ruibin Ding<sup>2, 1</sup>, Feng Zhou<sup>1, 2</sup>

<sup>1</sup>State Key Laboratory of Satellite Ocean Environment Dynamics, Second Institute of Oceanography,

5 State Oceanic Administration, Hangzhou, China

<sup>2</sup>Ocean College, Zhejiang University, Zhoushan, China

<sup>3</sup>Institute of Oceanography, University of Hamburg, Hamburg, Germany

*Correspondence to:* Daji Huang (djhuang@sio.org.cn)

### Highlights

- 10 ● Synoptic fluctuations of the wintertime Taiwan Warm Current appear mainly in two areas: north of Taiwan and the inshore area
- Synoptic fluctuation is mainly driven by the Taiwan Strait Current north of Taiwan and by wind in the inshore area
- Large Taiwan Strait Current intrusion generates a cross-shore transport from the coastal area to the 15 offshore area
- Winter monsoon affects the alongshore transport of Taiwan Warm Current water between the 30 and 100 m isobaths
- Winter monsoon affects the cross-shore transport of Taiwan Warm Current water at the latitudes 20 26.5 °N and 28 °N

**Abstract.** The seasonal mean and synoptic fluctuation of the wintertime Taiwan Warm Current (TWC) were investigated using a well validated finite volume community ocean model. The spatial distribution and dynamics of the synoptic fluctuation were highlighted. The seasonal mean of the wintertime TWC has two branches: an inshore branch between the 30 and 100 m isobaths and an offshore branch between the 100 and 200 m isobaths. The Coriolis term is much larger than the inertia term and is almost balanced by the pressure gradient term in both branches, indicating the geostrophic balance of the mean current. Two areas with significant fluctuations of the TWC were identified during wintertime. One of the areas is located to the north of Taiwan with velocities varying in the cross-shore direction. These significant cross-shore fluctuations are driven by barotropic pressure gradients associated with the intrusion of the Taiwan Strait Current (TSC). When a larger TSC intrudes north of Taiwan, the isobaric slope tilts downward from south to north, leading to a cross-shore current from the coastal area to the offshore area. When the TSC intrusion is weak, the cross-shore current to the north of Taiwan is directed from offshore to inshore. The other area of significant fluctuation is located in the inshore area, extending in the region between the 30 and 100 m isobaths. The fluctuations are generally strong in the alongshore direction, in particular at the latitudes  $26.5^{\circ}\text{N}$  and  $28^{\circ}\text{N}$  where they are important for the local cross-shore transports. Wind affects the synoptic fluctuation through episodic events. When the northeasterly monsoon prevails, the southward Zhe-Min Coastal Current dominates the inshore area associated with a deepening of the mixed layer. When the winter monsoon is weakened or the southerly wind prevails, the northward TWC dominates in the inshore area.

40

**Keywords:**

Synoptic fluctuation, East China Sea, Taiwan Warm Current, Taiwan Strait Current, Kuroshio

## 1 Introduction

45

On the East China Sea (ECS) shelf, the mean path of the Taiwan Warm Current (TWC) has two branches: the inshore branch along the 50 m isobath and the offshore branch along the 100 m isobath (Su and Pan, 1987). The summer TWC has been well studied because the current is stationary and strong, with an average speed of 0.3 m/s (Guan, 1978; Fang et al., 1991; Isobe, 2008; Yang et al., 2011, 2012). The spatial structure and temporal variation of the wintertime TWC are less known due to its weak mean velocity superimposed by pronounced small-scale spatial and synoptic temporal variations.

50

55

60

The wintertime TWC on the ECS shelf shows synoptic fluctuations (Cui et al., 2004; Zhu et al., 2004; Zeng et al., 2012; Huang et al., 2016). These synoptic fluctuations show some features common with those over other continental shelves, i.e., they have periods between 3 and 15 days and are associated with coastal sea level changes, which can be explained by local winds or by coastal trapped waves (Huyer, 1990). These synoptic fluctuations are also known to influence the regional material transport, especially when the amplitude of the fluctuations is comparable to, or even larger than, the mean current. On the ECS shelf, some recent observations have shown that the intermittency of the TWC in winter reaches maximum velocity variations larger than 0.2 m/s (Zhu et al., 2004; Zeng et al., 2012). Moreover, it has been observed that the intermittency of the TWC in winter causes a cross-shelf current which is closely linked to the alongshore component (Huang et al., 2016). Therefore, we focus on studying the spatial patterns of synoptic fluctuations to better understand the role of the wintertime TWC on the cross-shelf water exchange.

A comparison between the wintertime climatological density (Fig. 1a) and synoptic density distributions observed during two surveys (Figs. 1b and 1c) suggests that two distinct areas with significant synoptic fluctuations exist. The climatological density is taken from the Generalized Digital Environment Model (GDEM, Carnes, 2009) data, and the two surveys were carried out in February 2007 by two research vessels. Because the isopycnal lines are closely related to geostrophic currents, we can infer the strength of the TWC from the horizontal gradient of the isopycnals between  $24\text{-}\sigma_t$  and  $25\text{-}\sigma_t$  contours (Fig. 1a). This accounts for the fact that in winter the water mass of TWC is located in this density range [according to the hydrography analysis of Su et al. (1994)]. The two-branch structure of the TWC can be inferred from the wintertime climatological density. In this paper, we defined that the near-coast area is the area between the coast and 30 m isobath where the Zhe-Min Coastal Current (ZMCC) occurs; the inshore area is the area between the 30 and 100 m isobaths where the TWC inshore branch dominates; and the offshore area is the region between the 100 and 200 m isobaths where the TWC offshore branch prevails. However, these two branches were missing during the two synoptic surveys (Figs. 1b and 1c), indicating strong synoptic fluctuations of the TWC on the ECS shelf. Furthermore, the density anomalies between the two surveys and the GDEM data (Figs. 1d and 1e) indicate that the most significant fluctuations are located north of Taiwan and in the inshore area. Both surveys show negative density anomalies north of Taiwan, indicating that the TWC was weak and that less low-density coastal water was transported to the ECS shelf during the observational periods. The density anomalies in the inshore area show different patterns for the two synoptic surveys, with a positive anomaly in the first survey (Fig. 1d) and a negative anomaly in the second (Fig. 1e), indicating a much stronger synoptic fluctuation in the inshore area.

Figure 1

Candidate factors for driving these synoptic fluctuations are local wind, surface cooling, and the upstream  
90 currents of the Kuroshio Current and the Taiwan Strait Current (TSC). As discussed by Huyer (1990),  
wind is often considered as the major driving mechanism of synoptic fluctuations of the wintertime TWC.  
The northeasterly monsoon wind in winter blows against the northeastward TWC and produces a  
southwestward ZMCC (Chuang and Liang, 1994; Oey et al., 2010). Zhu et al. (2004) suggested that the  
occurrence and duration of the TWC are associated with the meandering of the Kuroshio Current north  
95 of Taiwan. The TSC, as an upstream flow of the TWC, also influences the synoptic fluctuation of the  
wintertime TWC. Guan and Fang (2006) showed evidence that the TSC and the TWC merge in the area  
between the Taiwan Strait and the Zhe-Min coastal region. Takahashi and Morimoto (2013) pointed out  
that the annual variation of the TWC is characterized by the propagation of vorticity anomalies  
originating from northeast of the Taiwan Strait.

100

To explore the spatial distribution of synoptic fluctuations of the wintertime TWC on the ECS shelf,  
current data with high resolution in both space and time are required. Previous studies on the wintertime  
TWC were based on cruise surveys (Su and Pan, 1987; Chen et al., 1994; Chen and Wang, 1999),  
anchored mooring observations (Zhu et al., 2004; Zeng et al., 2012; Huang et al., 2016) and numerical  
105 simulations (Guo et al., 2003, 2006; Yang et al., 2011, 2012; Xuan et al., 2012). The observation data are  
limited in terms of temporal and spatial coverage; hence, they cannot fully reveal the synoptic  
fluctuations of the TWC and their regional differences. Numerical simulations provide a promising  
approach for studying the overall structure and driving mechanisms of synoptic fluctuations of the TWC

in more detail.

110

In this study, the Finite Volume Coastal Ocean Model (FVCOM; Chen et al., 2003) is used to investigate synoptic fluctuations and their mechanisms of the wintertime TWC. The rest of this paper is organized as follows. In Sect. 2, we provide a description of methods and validation. The mean distribution, synoptic fluctuations, and dynamic diagnostics of the wintertime TWC are given in Sect. 3. The impact of synoptic fluctuation on water exchange is further discussed in Sect. 4, followed by conclusions in Sect. 5.

## 2 Methods and validation

### 2.1 Model configuration

120 To investigate the currents (TWC, Kuroshio Current, ZMCC, etc.) and their synoptic fluctuations on the ECS shelf, an unstructured-grid FVCOM was developed for the entire Bohai, Yellow, and East China Seas (part of the Japan/East Sea, and part of the Pacific Ocean). A regional refinement of the resolution (approximately 3 km) was specified around the ECS shelf break at the 200 m isobaths, where a strong excursion of the Kuroshio Current also occurs. The General Bathymetric Chart of the Oceans (Smith and Sandwell, 1997) provides high-resolution (approximately 1 km) bathymetric data. Twenty vertical layers were specified in the water column in a sigma-stretched coordinate system. A detailed description of model configuration can be found in Xuan et al. (2016).

The driving forces of the numerical simulation include tides, river discharge, surface heat fluxes, wind, and open boundary conditions. Harmonic constants of 11 major tidal constituents ( $M_2$ ,  $S_2$ ,  $N_2$ ,  $K_2$ ,  $K_1$ ,  $O_1$ ,

130

$P_1$ ,  $Q_1$ ,  $M_4$ ,  $MS_4$ , and  $MN_4$ ) were used; these are based on the Oregon State University global inverse tidal model TPXO.7.0 (Egbert et al., 1994; Egbert and Erofeeva, 2002). The river discharge of the Changjiang and Huanghe were taken from publicly available observation data at the Datong hydrometric station (<http://yu-zhu.vicp.net/>). The daily-mean heat fluxes were from the objectively analyzed air–sea  
135 fluxes (Yu and Weller, 2007), and the 3-hourly wind stress data was from the ERA-40 re-analysis (Uppala et al., 2005). The open boundary conditions, including daily temperature, salinity, and velocities at the Taiwan Strait, the western Pacific Ocean, and the Japan/East Sea, were obtained from the Hybrid Coordinate Ocean Model (Bleck, 2002) and interpolated onto the FVCOM model grid points. The temporal resolution of all the driving force fields is better than or equal to one day, which is essential to  
140 resolve synoptic fluctuations.

The hindcast outputs of sea surface height, temperature, salinity, and velocities for the five years of simulation from 2009 to 2013 are used, following three years of spin up from the initial climatological conditions. The model time step was 90 seconds. All of the output fields were processed with a tidal filter  
145 (Godin, 1972) to remove tidal oscillations (considering that the major time scale of synoptic fluctuations in this study area is 3–15 days).

Since the currents in 2009 could partly be validated by means of available observational data (see Sect. 2.2), the currents from January 1 to February 28, 2009 were selected for analysis of the wintertime TWC.  
150

## **2.2 Validation of the mean currents and synoptic fluctuations**

The mean current was calculated by averaging the outputs of January and February 2009. We validated

the mean flow in terms of overall structure, boundary fluxes, and coastal currents.

155 The overall structure of the surface mean flow (Fig. 2) shows three major currents in the ECS in winter:  
the Kuroshio Current, the TWC, and the ZMCC. The Kuroshio Current, with a speed of about 1 m/s,  
enters the ECS just northeast of Taiwan and flows along the shelf break up to the northern area and  
ultimately leaves the ECS through the Tokara Strait. Both the route and strength of the Kuroshio are  
comparable with those reported in the literature (Guan, 1978; Qiu and Imasato, 1990). The TWC has two  
160 northward branches, one inshore (between the 30 and 100 m isobaths) and another offshore (between the  
100 and 200 m isobaths), which is consistent with Su and Pan (1987). The southward directed ZMCC in  
the nearshore area from the Changjiang Estuary to the Taiwan Strait agrees well with that reported in  
previous studies (Guan and Mao, 1982; Zeng et al., 2012).

165 The simulated volume transports across the Taiwan Strait, the East Taiwan Channel, the Tsushima Strait,  
the Tokara Strait, and the shelf break of the 200 m isobath were validated using results from the literature  
(Table 1). The volume transports across the Taiwan Strait and the Tokara Strait, and the cross-shelf  
exchange, affected the path and magnitude of the TWC. The annual mean transport across the 200 m  
isobath toward the shelf is 1.66 Sv, which is balanced by the inflow from the Taiwan Strait (1.22 Sv) and  
170 the outflow through the Tsushima Strait (2.85 Sv).

Figure 2

Table 1



Figure 3 shows a comparison between simulation and observation results for the alongshore currents and the cross-shore currents on the ECS shelf. The observational data were obtained from four mooring surveys (Fig. 2, red stations) off the Zhe-Min coast (Zeng et al., 2012). The observed and simulated currents were both averaged for the observational period, which was from January 1 to February 28, 180 2009. We defined the alongshore direction from southwest ( $218^\circ$ ) to northeast ( $38^\circ$ ), which is the mean tangential direction of the isobaths on the southwestern shelf of the ECS. The cross-shelf direction is the mean normal direction of the isobaths from northwest ( $308^\circ$ ) to southeast ( $128^\circ$ ). The alongshore components (Figs. 3a and 3b) show that the ZMCC flows southwestward parallel to the coast in winter, with a maximum speed of 0.15 m/s along the 30 m isobath. The TWC flows northeastward with a speed 185 of 0.05 m/s, and the core is located in the lower layer at about 50 m at Station 4. The cross-shore component (Figs. 3c and 3d) is much weaker than the alongshore components, and it shows a complex spatial pattern. It flows offshore in the upper layer and onshore in the lower layer at Station 1. Moreover, it mainly flows onshore at Station 2, and it flows offshore in the entire water column at Stations 3 and 4. Altogether, the simulated pattern and magnitude both of the alongshore and cross-shore components are 190 in good agreement with the observations. However, there are some differences between the observed and simulated results; for example, the simulated ZMCC occupies a broader space than that in the observations. This may have been caused by the relatively low number of observational stations.

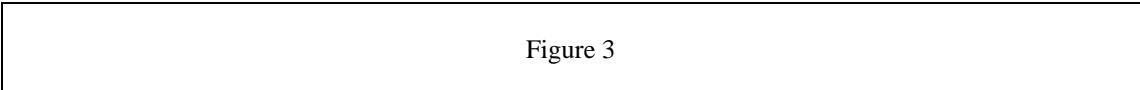

Figure 3

Synoptic fluctuations of the wintertime TWC were also validated against the mooring results (Fig. 4).

Since the TWC shows a strong signature at Station 4, the time series of the alongshore currents and cross-shore currents in the whole water column of Station 4 were used for the validation. To eliminate the influence of local effects, the simulated currents were averaged in a  $10 \times 10 \text{ km}^2$  area around Station 4.

200 Both the observed and simulated results show that the TWC fluctuates with a period of 3–15 days. The simulated TWC (Fig. 4a, warm color) appeared stronger ( $> 0.1 \text{ m/s}$ ) on Jan. 7, Jan. 12, Jan. 18, Jan. 21, Jan. 26, Jan. 29, Feb. 10, Feb. 14, Feb. 19, Feb. 22, and Feb. 25, which agrees well with data from the observations (Fig. 4b). The time series of the simulated cross-shore component (Fig. 4c) are virtually in phase with the observations (Fig. 4d). In contrast to the anisotropic feature for the mean currents (Fig. 3),  
205 i.e., that the alongshore component is nearly one order of magnitude larger than the cross-shore component, the magnitude of the cross-shore fluctuations is comparable to the alongshore fluctuations.

Figure 4

### 210 **2.3 EOF analysis of synoptic fluctuations**

The Empirical Orthogonal Function (EOF) method (Emery and Thomson, 2001) was used to analyze synoptic fluctuations of the wintertime TWC. The simulated currents from Jan. 1 to Feb. 28, 2009 were selected and their anomalies were calculated. Then, using the Matlab EOF-function, the current vectors were separated into several orthogonal modes to show the spatial and temporal variations. Because the  
215 first two leading modes explain 91 % of the total variance, only these two modes were used for the analysis.

The spatial distributions of the two leading EOF modes were used to analyze the regional difference of

the synoptic fluctuations. To investigate the driving force of the two EOF modes, the temporal variation  
 220 was compared to the potential influence factors, such as wind, upstream currents, and net surface heat  
 flux.

#### 2.4 Momentum analysis

The driving mechanisms of the synoptic fluctuations were further analyzed using the momentum  
 225 equation. First, the momentum balance as implemented in FVCOM (Chen et al., 2003) is shown in Eq.  
 (1). The three terms on the left hand side represent local acceleration, Coriolis acceleration, and advection,  
 respectively, and the three terms on the right hand side represent pressure gradient, friction, and diffusion,  
 respectively.

$$\frac{\partial \vec{V}}{\partial t} - 2\vec{\Omega} \times \vec{V} + (\vec{V} \cdot \nabla \vec{V}) = -\frac{1}{\rho_0} \nabla P + \frac{\partial}{\partial z} (K_m \frac{\partial \vec{V}}{\partial z}) + \vec{F}, \quad (1)$$

230 where  $V$  is velocity,  $\Omega$  is the Earth's rotation angular velocity,  $\rho_0$  is the average density,  $P$  is pressure,  
 $K_m$  is the vertical eddy viscosity coefficient, and  $F$  is horizontal diffusion.

Second, according to the hydrostatic assumption used in FVCOM [as shown in Eq. (2)], the pressure is  
 integrated from depth  $z$  to the sea surface. This results in Eq. (3), which indicates that pressure gradient  
 235 can be decomposed into the effects of the barotropic and baroclinic components, as shown in Eq. (4).

$$\frac{\partial P}{\partial z} = \rho g, \quad (2)$$

$$P_z = \int_z^\eta \rho g dz = \int_z^\eta (\rho_0 + \rho') g dz = \rho_0 g (z + \eta) + \int_z^\eta \rho' g dz, \quad (3)$$

$$\nabla \bar{P} = \rho_0 g \nabla \eta + \nabla \left( \int_z^\eta \rho' g dz \right), \quad (4)$$

where  $\rho$  is density,  $\rho'$  is density anomaly,  $g$  is the gravitational acceleration, and  $\eta$  is sea surface



that the intrusions of the TSC and the Kuroshio Current both affected the origin of the offshore branch (Fig. 6, S1–S3). In wintertime, both branches flowed on the isobaths, which is fully in accordance with the conservation of potential vorticity.

265 We further examined the subsurface current core using the depth of the VMV (Fig. 5b). We found that the VMV of the TWC was located 40–60 m below the surface at the inshore branch and 20–40 m below the surface at the offshore branch. Figure 6 shows the VMV positions in the subsurface layer; it also illustrates that the depth of the subsurface VMV in the inshore branch was deeper than that in the offshore branch. The northerly wind in winter weakens the northward TWC, particularly in the upper layer, which  
270 leads to the formation of the subsurface VMV. Different cooling makes the coastal shallow water cooler than the offshore deep water; hence generating a horizontal density gradient leading to a southeastward vertical current shear according to the thermal wind relationship, resulting in an increasing southwestward flow component from surface to bottom, which in turn weakens the northeastward flow of the TWC inshore branch. The fact that the depth of the subsurface VMV in the inshore branch is  
275 greater than that in the offshore branch indicates that the effects of baroclinicity and wind friction on the TWC in the coastal area are stronger than those in the offshore area.

The magnitude of the wintertime TWC was obtained by flux analysis. Two dividing lines (Fig. 5a, red lines) were defined as the boundaries for the ZMCC, the TWC inshore branch, and the TWC offshore  
280 branch, which had the weakest flows. The flux of each branch (Fig. 5c) was calculated using the horizontal integration between the boundaries and the vertical integration in the water column. The inshore branch intensifies along its way and becomes significant north of 26.5°N, showing particularly

strong flow velocities between 27.5 and 28.0 °N. In this area, the subsurface current was much stronger from S4 to S5 than in the other areas (Fig. 6). The flux in the entire offshore branch was large, particularly north of Taiwan.

285

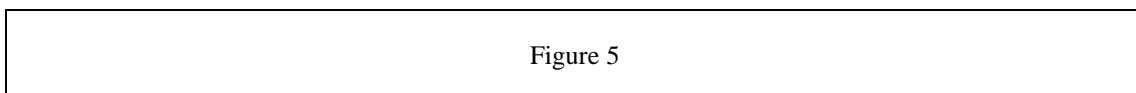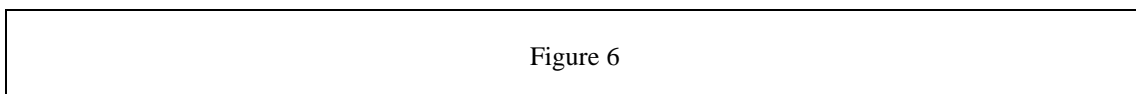

290

### 3.2 Synoptic fluctuations

The observations (Fig. 4) have demonstrated that the synoptic fluctuation in the TWC inshore branch (near 121.5 °E, 27.0 °N) is significant. We further investigated the regional difference of fluctuations in the two TWC branches in winter 2009 using the following three steps: (i) two regions with significant fluctuations are identified by the current standard deviations of the VMV (Fig. 7) and the corresponding temporal variation of vertical structures at their extremes (Fig. 8); (ii) each of the two significant fluctuations is decomposed into EOF components (Fig. 9), and (iii) the influence factors, such as wind, upstream currents, and net surface heat flux, are investigated by examining their correlations with the first two leading EOF components (Figs. 10 and 11).

295

300

The current standard deviations (Fig. 7) shows that prominent fluctuations occurred in two regions: north of Taiwan and the inshore area. The standard deviations of VMV at the two regions were larger than 0.1 m/s (comparable to the mean currents). In the area north of Taiwan, the fluctuation was located in the origin area of the TWC offshore branch. The fluctuation in this region was in phase with the fluctuation

305 in the Taiwan Strait, indicating that the TSC played an important role in generating the fluctuation north  
of Taiwan (to a greater extent than did the Kuroshio intrusion). The TWC fluctuation had a strong  
magnitude in the cross-shore direction, which means the fluctuation transported the water north of  
Taiwan to both the inshore and offshore branches. In the inshore area, the fluctuation was located in a  
wide region between the 30 and 100 m isobaths, where the southwestward flowing ZMCC and the  
310 northeastward directed TWC meet. The currents fluctuated in the alongshore direction, indicating that  
the TWC inshore branch occurred episodically.

Figure 7

315 The vertical structures of the fluctuations north of Taiwan and in the inshore area at two representative  
points and their relation with upper mixed layer depth are further analyzed (Fig. 8). The major component  
(the alongshore current) of the TWC in each of the two regions (P1 and P2, Fig. 7) is used to show the  
vertical structure of the fluctuation. The depths of the upper mixed layer were determined by a  
Richardson number criterion [as in Xuan et al. (2012)], where the critical Richardson number equals 0.25.  
320 The mean depth of the upper mixed layer north of Taiwan (20 m) was much shallower than the mean  
depth in the inshore area (42 m). However, the TWC (Fig. 8, warm color) fluctuated with significant  
variations of the upper mixed layer depth (Fig. 8, gray lines) in both areas. When the upper mixed layer  
deepened, the northeastward TWC (Fig. 8, warm color) was weakened or even replaced by the  
southwestward ZMCC, and vice versa. Hence, wind and surface cooling, which both drive the mixed  
325 layer depth, can affect the TWC fluctuation.

Figure 8

The TWC fluctuations were further decomposed into EOF modes. The first two leading EOF modes  
330 account 54% and 37% of the total variances (Fig. 9), which were associated with the two prominent  
fluctuations north of Taiwan and in the inshore area (Fig. 7). Both EOF modes had a maximum fluctuation  
larger than 0.2 m/s (comparable to the mean currents). The spatial pattern of the first EOF mode (EOF1,  
Fig. 9a) shows that the fluctuation continued from the Taiwan Strait to the area north of Taiwan,  
indicating that the fluctuation north of Taiwan was related to the TSC and not to the Kuroshio Current.  
335 The alongshore component also showed a strong fluctuation in the Taiwan Strait, which means that the  
TSC episodically intruded the shelf. The cross-shelf component revealed a great fluctuation north of  
Taiwan that was larger than 0.1 m/s. This cross-shore fluctuation impacted on the trajectory of the TWS  
water, synoptically flowing into the TWC inshore branch, offshore branch, or Kuroshio Current.

340 The spatial pattern of the second EOF mode (EOF2, Fig. 9b) shows a synoptic fluctuation in the inshore  
area. The fluctuation mainly varied in the alongshore direction, which indicates the episodic occurrence  
of the TWC inshore branch. The area with alongshore fluctuation (Fig. 9d) larger than 0.1 m/s was located  
between the 30 and 100 m isobaths, which demonstrates that the TWC could also episodically affect this  
area. In addition, there were cross-shore fluctuations in the inshore area (Fig. 9f), mostly along the  
345 latitudes 26.5°N and 28°N. The latitudes of great cross-shore fluctuations agreed well with the latitudes  
where the TWC offshore branch of the mean currents (Fig. 5a) turned to the cross-shore direction. This  
indicated that the cross-shore transports were most significant at the latitudes 26.5°N and 28°N,  
according to both the mean currents and the synoptic fluctuations.



350 Figure 10 shows the temporal variation of EOF1 and its relation with north-south component of wind speed, net surface heat flux, the TSC, and the Kuroshio Current. We found a close correlation between EOF1 and TSC ( $R = 0.86$ ), demonstrating that the TSC played the most important role in generating the TWC fluctuation north of Taiwan. The EOF1 and TSC were positively correlated, meaning that a larger TSC intrusion north of Taiwan leads to a cross-shore current from the coastal area to the offshore area  
355 and that a weak TSC intrusion causes a cross-shore current from offshore to inshore north of Taiwan.

Figure 11 shows the temporal variation of EOF2 and its relation with the north-south component of wind speed, net surface heat flux, the TSC, and the Kuroshio Current. It can be seen that EOF2 and wind are well correlated ( $R = 0.89$ ), indicating the important role of wind in generating the TWC fluctuation in  
360 the inshore area. The northerly monsoon would greatly enhance the southwestward ZMCC, which replaces the northeastward TWC in the inshore area. Together with the effect of net surface heat flux, the stronger northerly monsoon during Jan. 5-13, Jan. 19-25 and Feb. 16-18 causes the deepening of the mixed layer (P2, Fig. 8).

365

Figure 9

Figure 10

Figure 11

370

### 3.3 Dynamic diagnostics

The seasonal mean of the water column momentum balance (Fig. 12) is used to show the overall distribution of the fundamental forces over the ECS shelf. The Coriolis force (Fig. 12a) is mainly balanced by the total pressure (Fig. 12b) in both branches, indicating the dominant role of geostrophic balance in the wintertime TWC. However, the wind-induced surface friction plays an important role in the TWC, especially in the inshore area (Fig. 12c). The bottom friction has an impact north of Taiwan under the condition of significant Kuroshio intrusion (Fig. 12d). The effects of advection and acceleration are predominantly local indicated by mostly incoherent small scale distributions (Figs. 12e, 12f), so they can be ignored when studying the large-scale current of the wintertime TWC.

380

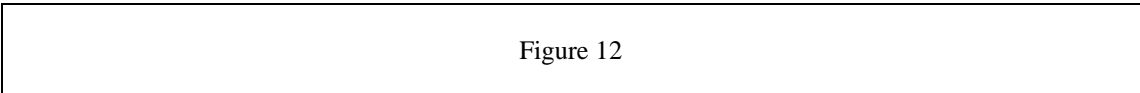

Figure 12

The variation of the driving forces at two representative points P1 and P2 were used to analyze the dynamics of synoptic fluctuations north of Taiwan and in the inshore area. Regarding the results from the EOF analysis, the three force terms, namely Coriolis, total pressure, and wind (Fig. 13), were selected to investigate the effect of the TSC on the fluctuation north of Taiwan (Fig. 9a) and the effect of wind on the fluctuation in the inshore area (Fig. 9b).

In the area north of Taiwan, the cross-shore fluctuations were induced by the TSC intrusion. The variation of alongshore Coriolis force (Fig. 13a, black line) was much greater than the cross-shore Coriolis force (Fig. 13b, black line), which means that the fluctuation north of Taiwan was mainly in the cross-shore

390

direction. The Coriolis force (Fig. 13a, black line) was mainly balanced by the total pressure (Fig. 13a, blue line), which means the currents fluctuations north of Taiwan are dominated by geostrophic balance.

As mentioned in Sect. 3.2, the TWC fluctuation north of Taiwan was associated with the TSC rather than  
395 with the Kuroshio Current. Therefore, the TSC mainly caused variations in the barotropic pressure gradients, which further generated the cross-shore fluctuation. The mechanism can be interpreted as follows. When a larger TSC intrusion occurred, the isobaric slope tilted downward from south to north, generating a cross-shore current from the coastal area to the offshore area. On the contrary, when the TSC intrusion was weak, the Kuroshio intrusion from offshore to inshore dominated north of Taiwan.

400

Wind friction (Figs. 13c and 13d) was a fundamental factor in generating the fluctuations in the inshore area. Although the geostrophic balance dominated in the inshore branch for most of the time, the episodically strong winter monsoon had an important role in generating the TWC fluctuations. The negative Coriolis force (Fig. 13c, black line) shows that the southwestward ZMCC occurred on Jan. 12,  
405 Jan. 22, and Feb. 14, 2009 and was associated with a northerly wind (Fig. 13c, red line). It indicates that strong winter monsoon can weaken or even stop the TWC in the inshore area, causing the intermittency of the TWC inshore branch.

Figure 13

410

#### 4 Discussion

The wintertime TWC, which is manifested by with two subsurface branches and significant synoptic fluctuations, has a very different structure when compared with the stationary and surface summertime

TWC reported in previous studies (Guan, 1978; Fang et al., 1991; Isobe, 2008). The synoptic fluctuations  
415 modulate the spatial structure of the wintertime TWC, especially when their magnitudes are comparable  
with that of the mean currents, such as the two prominent fluctuations north of Taiwan and in the inshore  
area (Fig. 7). Therefore, the two prominent fluctuations will be discussed next in terms of their  
contributions to the alongshore and cross-shore transports.

#### 420 **4.1 Cross-shore transport north of Taiwan induced by the TSC**

In the area north of Taiwan, the TSC intrusion generated strong fluctuations of the TWC in the cross-  
shore direction (Fig. 9a). When a larger TSC intrusion occurred, the isobaric slope tilted downward from  
south to north, generating a cross-shore current from the coastal area to the offshore area. Compared to  
the reported summer route that transports Taiwan Strait water to the inshore area between the 30 and 100  
425 m isobaths (Guan, 1978; Fang et al., 1991; Isobe, 2008; Yang et al., 2011, 2012), our results showed that  
most Taiwan Strait water was transported to the TWC offshore branch and to the Kuroshio area as a result  
of the cross-shore fluctuations induced by the synoptic TSC intrusion.

A numerical tracer simulation was used to analyze the role of the cross-shore fluctuation in the transport  
430 of the TSC water and the Kuroshio water north of Taiwan. The release location and start date of the  
particles were configured as follows. Two sections, one in the Taiwan Strait and another in the East  
Taiwan Channel, were selected as the source locations for the water masses of the TSC and the Kuroshio,  
respectively. The particles were released on January 1, 2009 and tracked until March 31, 2009 (a total of  
90 days). The tracer assimilation was part of the FVCOM simulation; therefore, all the above mentioned  
435 dynamics were involved, e.g., tide, wind, and boundary forces.

Figure 14a shows the tracers originating from the TSC area. Unlike the traditional route, where the TSC water flows from the Taiwan Strait to the inshore area between the 30 and 100 m isobaths, most particles (Fig. 14a, gray lines) were concentrated in the offshore branch under the effect of cross-shore fluctuation.

440 Two particles were selected to show the inshore route (Fig. 14a, red line) and offshore route (Fig. 14a, blue line), with both passing the area north of Taiwan. When the two particles arrived at the area north of Taiwan, the behavior of the tracers, according to specific velocity conditions (Fig. 14c), was very different: a northwestward transport occurred on Jan. 25 for the inshore particles (Fig. 14c) and a northeastward transport occurred on Feb. 12 for the offshore particles (Fig. 14c). The velocity conditions

445 in the area north of Taiwan corresponded to the variation of the Taiwan Strait flux (Fig. 10), which shows that the Taiwan Strait flux on Feb. 12 was much greater than on Jan. 25. Therefore, it can be concluded that the TSC intrusion induced an offshore transport north of Taiwan.

Figure 14b shows the tracers originating from the Kuroshio area. In the same way as the TSC water, the

450 Kuroshio water was also transported to the northern shelf via both the inshore branch and the offshore branch. The separation of the two branches north of Taiwan was caused by cross-shore fluctuations of the currents. When the two particles arrived at the area north of Taiwan, a northwestward transport occurred on Feb. 2 for the inshore particles (Fig. 14c) and a northeastward transport occurred on Feb. 12 for the offshore particles (Fig. 14c). This means that the offshore transport induced by the TSC also had

455 an effect on the distribution of Kuroshio water north of Taiwan. Liu et al. (2016) showed that the winter TSC originated from a small branch of Kuroshio intrusion into the Luzon Strait. Our results complement this picture, since they show that most TSC particles flow into the TWC offshore branch under the

influence of cross-shore fluctuation.

460

Figure 14

Our results may underestimate the impact of Kuroshio intrusion on the fluctuation of the TWC north of Taiwan, especially at the seasonal and interannual time scales. Wei et al. (2013) demonstrated that the annual and interannual variations of the Kuroshio volume transport are large. In addition, Zhou et al. (2015) pointed out that the annual and interannual variations of the Kuroshio intrusion north of Taiwan are prominent. Liu et al. (2014b) presented supportive evidence that the Kuroshio intrusion, from east of Taiwan to the onshore area north of Taiwan, is closely related to the Kuroshio volume transport. This relation between the Kuroshio intrusion and the Kuroshio volume transport had been interpreted by Su and Pan (1987) as the  $\beta$ -effect because of the sudden change in topography northeast of Taiwan. Our results show that the intra-seasonal variation of the Kuroshio intrusion and the Kuroshio volume transport was negligible compared with the TSC variation at the same time scale, indicating that the synoptic fluctuation of TWC north of Taiwan is mainly induced by the TSC.

470

#### **4.2 Water exchange in the inshore area induced by wind**

475 In the inshore area, the synoptic fluctuations of the TWC (Fig. 9b) caused by wind were generally strong in the alongshore direction and regionally important (along the latitudes 26.5°N and 28°N) in the cross-shore direction. The alongshore fluctuations showed that the TWC inshore branch occurred episodically. This episodic occurrence of the TWC agrees with the results from a previous study based on four mooring surveys off the Zhe-Min coast (Zeng et al., 2012). The mechanism of the episodic occurrence of the TWC

480 was mainly associated with the winter monsoon, which agrees with the analysis of observational data by Huang et al. (2016). However, the overall magnitude of the TWC fluctuation, and its role on the cross-shore flux, are still not fully understood due to the short-term nature of the observational data.

We investigated the magnitude of TWC fluctuation, and its role on the water exchange, in the inshore  
485 area. Previous studies (Su and Pan, 1987; Zeng et al., 2012) show that the TWC flows between the 50 and 100 m isobaths, whereas the ZMCC water dominates the coastal area west of the 50 m isobath in the surface layer. As mentioned when discussing Figure 9d, the strongest TWC could reach the coastal area as close as the 30 m isobath, being stronger than those reported in the literature. Moreover, the area with large fluctuations spanned the area between the 30 and 100 m isobaths (Fig. 9b), indicating that water  
490 exchange between the ZMCC water and the TWC water exists in the area between the 30 and 100 m isobaths.

The episodic occurrence of the TWC inshore branch is directly related to the relative importance of the southwestward ZMCC (Fig. 15, blue arrows) and the northeastward TWC (Fig. 15, red arrows). When  
495 the winter monsoon (the northerly wind) prevails, the ZMCC occupies most of the inshore area and the TWC inshore branch weakens (Fig. 15a). On the contrary, the TWC inshore branch can intrude into the near-coast area under southerly wind conditions (Fig. 15b). The boundary between the coastal current and the TWC may shift from the 100 m isobaths to the 30 m isobath in the cross-shore direction, covering the entire area of the TWC inshore branch.

500

Our results further reveal that strong wind-induced cross-shore fluctuations occur in the inshore area (Fig.

9f). This cross-shore fluctuation has a significant ecological impact because of the connected nutrient transport (Zhao and Guo, 2011). Ren et al. (2015) observed a cross-shore flux in the inshore area, which was triggered by the transition of northeasterly to southwesterly monsoonal winds. Their observed features can be further interpreted with our result that wind-induced fluctuations can affect the cross-shore water transport in the inshore area.

Largest cross-shore fluctuations were located at the latitudes 26.5° N and 28° N, which agreed well with the latitudes where the TWC offshore meanders occurred in the mean currents (Fig. 5a). This also indicates that the offshore transports were most significant along the latitudes 26.5° N and 28° N according to both the mean currents and the synoptic fluctuations. The offshore transport may be associated with the offshore-penetrating fronts of coastal water in the ECS. Many remote-sensing images (He et al. 2010; Bai et al. 2013) have exhibited offshore-penetrating fronts that crossed the 70 m isobath and played an important role in cross-shelf material exchange. Several mechanisms have been used to explain this process. Yuan and Qiao (2005) pointed out that both downwelling- and upwelling-favorable winds are associated with the occurrence of the offshore-penetrating front. Ren et al. (2015) suggested that the penetrating front is generated by the transition of northeasterly to southwesterly monsoonal winds. Wu (2015) suggested that the offshore-penetrating front is the response of buoyant coastal water to an along-isobath undulation of the ambient pycnocline, which is controlled by a temperature stratification of the water column. Our study offers a new interpretation, i.e., that the penetrating front is generated through the wind-induced fluctuations and the TWC offshore meanders.



525

## 5 Conclusions

The FVCOM model was able to reproduce the wintertime TWC in 2009 reasonably well, as shown by a validation in terms of the overall structure of the surface mean flow, the ECS boundary fluxes, and data from four mooring stations. The validation showed that the simulated TWC was comparable to the observed results, not only in terms of the mean currents but also in terms of the synoptic fluctuations.

The wintertime TWC showed two branches: one inshore and another offshore. The inshore branch covered an area between the 30 and 100 m isobaths and flowed northward via a straight route. The offshore branch was located between the 100 and 200 m isobaths and showed two prominent meanders. It was shown that the Coriolis force was balanced by the pressure gradient in both branches, indicating the dominant role of the geostrophic balance for the mean current in both branches.

Two regions with significant synoptic fluctuations, north of Taiwan and the inshore area, were investigated using the EOF method. The first two leading modes explained 91% of the total variance. EOF1 showed that fluctuations occurred in the cross-shore direction south of 26°N. These fluctuations were mainly associated with variation of the TSC flux. EOF2 showed significant fluctuation between the 30 and 100 m isobaths. These fluctuations caused the episodic existence of the TWC inshore branch in the alongshore direction and cross-shore fluctuations mainly at latitudes 26.5°N and 28°N, which were mainly associated with the variation of wind speed.

545

We also studied the different dynamic reasons for the fluctuations in the two regions. In the area north of Taiwan, the TSC and Kuroshio converged to initiate the TWC. A barotropic pressure anomaly was generated by TSC intrusion from the Taiwan Strait causing a barotropic pressure gradient in the alongshore direction; this explains why the synoptic fluctuations in this area occurred in the cross-shore direction. Additionally, the wind had a strong effect on the synoptic fluctuations in the inshore area. The northeasterly monsoon enhanced the southwestward ZMCC and replaced the TWC in the inshore area. This situation is reversed during the southwest monsoon.

The synoptic fluctuations north of Taiwan and in the inshore area are important for both the alongshore and cross-shore transports. Due to these fluctuations, the mixed water of the TSC and the Kuroshio was transported to both the inshore area and the offshore area, whereas most Taiwan Strait water was transported to the offshore area in winter. The inshore fluctuation not only caused an episodic occurrence of the TWC in the alongshore direction, which affected the alongshore transport of ZMCC water and TWC water between the 30 and 100 m isobaths, but also impacted the cross-shore transports along latitudes 26.5°N and 28°N.

### **Acknowledgement**

This study was jointly supported by the Sino-German cooperation in ocean and polar research under the grant BMBF-03F0701A (CLIFLUX), the National Natural Science Foundation of China (41306025, 41276028, 41321004) and the project of State Key Laboratory of Satellite Ocean Environment Dynamics, the Second Institute of Oceanography (SOEDZZ1512).

## References

- 570 Bai, Y., Pan, D., Cai, W. J., He, X., Wang, D., Tao, B., and Zhu, Q.: Remote sensing of salinity from satellite-derived CDOM in the Changjiang River dominated East China Sea, *J. Geophys. Res. Ocean*, 118, 227–243, 2013.
- Bleck, R.: An oceanic general circulation model framed in hybrid isopycnic-Cartesian coordinates, *Ocean Model.*, 37, 55–88, 2002.
- 575 Carnes, M. R.: Description and evaluation of GDEM-V3.0, NRL Rep. NRL/MR/7330-09-9165, Nav. Res. Lab., Washington, D. C, 2009.
- Chen, C., Liu, H., and Beardsley, R. C.: An unstructured, finite-volume, three-dimensional, primitive equation ocean model: application to coastal ocean and estuaries, *J. Atm. Oceanic Tech.*, 20, 159–186, 2003.
- 580 Chen, C., Beardsley, R. C., Limeburner, R., and Kim, K.: Comparison of winter and summer hydrographic observations in the Yellow and East China seas and adjacent Kuroshio during 1986, *Cont. Shelf Res.*, 14, 909–929, 1994.
- Chen, C. T. A. and Wang, S. L.: Carbon, alkalinity and nutrient budget on the East China Sea continental shelf, *J. Geophys. Res. Ocean*, 104, 20675–20686, 1999.
- 585 Chuang, W. S. and Liang, W. D.: Seasonal variability of intrusion of the Kuroshio water across the continental shelf northeast of Taiwan, *J. Oceanogr.*, 50(5), 531–542, 1994.
- Cui, M., Hu, D., and Wu, L.: Seasonal and intraseasonal variations of the surface Taiwan Warm Current, *Chin. J. Oceanol. Limnol.*, 22, 271–277, 2004.
- Egbert, G. D., Bennett, A., and Foreman, M.: TOPEX/Poseidon tides estimated using a global inverse model, *J. Geophys. Res.* 99, 24821–24852, doi: 10.1029/94JC01894, 1994.
- 590 Egbert, G. D. and Erofeeva, S. Y.: Efficient inverse modeling of barotropic ocean tides, *J. Atmos. Oceanic Technol.*, 19, 183–204, 2002.
- Emery, W. J. and Thomson, R. E.: Data analysis methods in physical oceanography, Second and revised version, 658 pp., Elsevier Science B.V., Amsterdam, The Netherlands, 2001.
- 595 Fang, G., Zhao, B., and Zhu, Y.: Water volume transport through the Taiwan Strait and the continental shelf of the East China Sea measured with current meters, in *Oceanography of Asian Marginal Seas*, edited by K. Takano, 345–358pp., doi:10.1016/S0422-9894(08)70107-7, Elsevier, New York, 1991.
- Feng, M., Mitsudera, H., and Yoshikawa, Y.: Structure and Variability of the Kuroshio Current in Tokara Strait, *J. Phys. Oceanogr.*, 30(9), 2257–2276, 2000.
- 600 Godin, G.: *The Analysis of Tides*, 264 pp., University of Toronto Press, Toronto, 1972.
- Guan, B. and Fang, G.: Winter counter-wind currents off the southeastern China coast: A review, *J. Oceanogr.*, 62, 1–24, 2006.
- Guan, B. and Mao, H.: A note on circulation of the East China Sea, *Chin. J. Oceanol. Limnol.*, 1, 5–16, 1982.
- 605 Guan, B. X.: A sketch of the current system of the East China Sea, in *Collected Papers of the Continental Shelf of the East China Sea (in Chinese)*, 126–133pp., Inst. of Oceanol., Chin. Acad. of Sci., Qingdao, China, 1978.
- Guo, X. Y., Hukuda, H., Miyazawa, Y., and Yamagata, T.: A triply nested ocean model for simulating the Kuroshio - Roles of horizontal resolution on JEBAR, *J. Phys. Oceanogr.*, 33, 146–169, 2003.
- 610 Guo, X. Y., Miyazawa, Y., and Yamagata, T.: The Kuroshio onshore intrusion along the shelf break of

- the East China Sea: The origin of the Tsushima Warm Current, *J. Phys. Oceanogr.*, 36, 2205–2231, doi:10.1175/JPO2976.1, 2006.
- He, L., Li, Y., Zhou, H., and Yuan, D.: Variability of cross-shelf penetrating fronts in the East China Sea, *Deep Sea Res.*, 57, 1820–1826, 2010.
- 615 Hsin, Y. C., Qiu, B., Chiang, T. L., and Wu, C. R.: Seasonal to interannual variations in the intensity and central position of the surface Kuroshio east of Taiwan, *J. Geophys. Res. Oceans*, 118(9), 4305–4316, 2013.
- Huang, D., Zeng, D., Ni, X., Zhang, T., Xuan, J., Zhou, F., Li, J., and He, S.: Alongshore and cross-shore circulations and their response to winter monsoon in the western East China Sea, *Deep-Sea Res. II*, 620 124, 6–18, <http://dx.doi.org/10.1016/j.dsr2.2015.01.001i>, 2016.
- Hung, J. J., Chen, C. H., Gong, G. C., Sheu, D. D., and Shiah, F. K.: Distributions, stoichiometric patterns and cross-shelf exports of dissolved organic matter in the East China Sea, *Deep-Sea Res. II*, 50, 1127–1145, 2003.
- Huyer, A.: Shelf circulation, In Mehaute, B. L., Hames, D. M. (Eds.), *The Sea, Volume 9: Ocean Engineering Science*, Wiley, pp. 423–466, 1990.
- 625 Isobe, A.: Recent advances in ocean - circulation research on the Yellow Sea and East China Sea shelves, *J. Oceanogr.*, 64, 569–584, doi:10.1007/s10872-008-0048-7, 2008.
- Johns, W. E., Lee, T. N., Zhang, D., Zantopp, R., Liu, C. T., and Yang, Y.: The Kuroshio east of Taiwan: Moored transport observations from the WOCE PCM-1 array, *J. Phys. Oceanogr.*, 31(4), 1031–1053, 630 2001.
- Lee, J. S. and Matsuno, T.: Intrusion of Kuroshio water onto the continental shelf of the East China Sea, *J. Oceanogr.*, 63, 309–325, 2007.
- Liu, C., Wang, F., Chen, X., and VonStorch, J. S.: Interannual variability of the Kuroshio onshore intrusion along the East China Sea shelf break: Effect of the Kuroshio volume transport, *J. Geophys. Res. Oceans*, 119, 6190–6209, doi:10.1002/2013JC009653, 2014a.
- 635 Liu T., Xu, J., He, Y., Lü H., Yao, Y., and Cai, S.: Numerical simulation of the Kuroshio intrusion into the South China Sea by a passive tracer, *Acta Oceanologica Sinica*, 35(9): 1–12, doi: 10.1007/s13131-016-0930-x, 2016.
- Liu X., Dong, C., Chen, D., and Su, J.: The pattern and variability of winter Kuroshio intrusion northeast of Taiwan, *J. Geophys. Res. Oceans*, 119, 5380–5394, DOI 10.1002/2014JC009879, 2014b.
- 640 Oey, L. Y., Hsin, Y. C., and Wu, C. R.: Why does the Kuroshio northeast of Taiwan shift shelfward in winter?, *Ocean Dynam.*, 60(2), 413–426, 2010.
- Qiu, B. and Imasato, N.: A numerical study on the formation of the Kuroshio countercurrent and the Kuroshio Branch Current in the East China Sea, *Cont. Shelf Res.*, 10, 165–184, doi:10.1016/0278-4343(90)90028-K, 1990.
- 645 Ren, J. L., Xuan, J., Wang, Z. W., Huang, D., and Zhang, J.: Cross-shelf transport of terrestrial Al enhanced by the transition of northeasterly to southwesterly monsoon wind over the East China Sea, *J. Geophys. Res. Oceans*, 120, doi:10.1002/2014JC010655, 2015.
- Smith, W. H. F. and Sandwell, D. T.: Global sea floor topography from satellite altimetry and ship depth soundings, *Science*, 277, 1956–1962, 1997.
- 650 Su, J. L. and Pan, Y. Q.: On the shelf circulation north of Taiwan, *Acta Oceanol. Sin.*, 6, 1–20, 1987.
- Su, J. L., Pan, Y. Q., and Liang, X. S.: Kuroshio intrusion and Taiwan warm current, *Oceanology of China Seas*. Springer Netherlands, 59–70, 1994.
- Takahashi, D. and Morimoto, A.: Mean field and annual variation of surface flow in the East China Sea

- 655 as revealed by combining satellite altimeter and drifter data, *Prog. Oceanogr.*, 111, 125–139, doi: 10.1016/j.pocean.2013.01.007, 2013.
- Teague, W., Jacobs, G., Ko, D., Tang, T., Chang, K. I., and Suk, M. S.: Connectivity of the Taiwan, Cheju, and Korea straits, *Conti. Shelf Res.*, 23(1), 63–77, 2003.
- Uppala, S. M., KÅllberg, P. W., Simmons, A. J., Andrae, U., Bechtold, V. D. C., Fiorino, M., Gibson, J. K., Haseler, J., Hernandez, A., Kelly, G. A., Li, X., Onogi, K., Saarinen, S., Sokka, N., Allan, R. P., Andersson, E., Arpe, K., Balmaseda, M. A., Beljaars, A. C. M., Berg, L. V. D., Bidlot, J., Bormann, N., Caires, S., Chevallier, F., Dethof, A., Dragosavac, M., Fisher, M., Fuentes, M., Hagemann, S., Hlm, E., Hoskins, B. J., Isaksen, I., Janssen, P. A. E. M., Jenne, R., McNally, A. P., Mahfouf, J.-F., Morcrette, J.-J., Rayner, N. A., Saunders, R. W., Simon, P., Sterl, A., Trenberth, K. E., Untch, A., Vasiljevic, D., Viterbo, P., and Woollen, J.: The ERA-40 re-analysis, *Q. J. R. Meteorol. Soc.*, 131, 2961–3012. doi:10.1256/qj.04.176, 2005.
- 660 Wang, Y., Jan, S., and Wang, D.: Transports and tidal current estimates in the Taiwan Strait from shipboard ADCP observations (1999–2001), *Estuarine Coastal Shelf Sci.*, 57(1), 193–199, 2003.
- Wei, Y., Huang, D., and Zhu, X. H.: Interannual to decadal variability of the Kuroshio Current in the east china sea from 1955 to 2010 as indicated by in-situ hydrographic data, *J. Oceanogr.*, 69(5), 571–589, 2013.
- 670 Wu, H.: Cross-shelf penetrating fronts: A response of buoyant coastal water to ambient pycnocline undulation, *J. Geophys. Res.*, 120, doi:10.1002/2014JC010686, 2015.
- Wu, C. R. and Hsin, Y. C.: Volume transport through the Taiwan Strait: a numerical study, *Terr. Atmos. Ocean. Sci.*, 16(2), 377–391, 2005.
- 675 Xuan, J., Huang, D., Zhou, F., Zhu, X. H., and Fan, X.: The role of wind on the detachment of low salinity water in the Changjiang Bank in summer, *J. Geophys. Res. Ocean*, 117, C10004, doi: 10.1029/2012JC008121, 2012.
- Xuan, J., Yang, Z., Huang, D., Wang, T., and Zhou, F.: Tidal residual current and its role in the mean flow on the Changjiang Bank, *J. Mar. Syst.*, 154, 66–81, doi: 10.1016/j.jmarsys.2015.04.005, 2016.
- 680 Xuan, J., Zhou, F., Huang, D., Zhu, X. H., Xing, C., and Fan, X.: Modelling the timing of major spring bloom events in the central Yellow Sea, *Estuarine Coastal Shelf Sci.*, 113, 283–292, 2012.
- Yang, D., Yin, B., Liu, Z., and Feng, X.: Numerical study of the ocean circulation on the East China Sea shelf and a Kuroshio bottom branch northeast of Taiwan in summer, *J. Geophys. Res. Ocean*, 116, C05015, doi:10.1029/2010JC006777, 2011.
- 685 Yang, D., Yin, B., Liu, Z., Bai, T., Qi, J., and Chen, H.: Numerical study on the pattern and origins of Kuroshio branches in the bottom water of southern East China Sea in summer, *J. Geophys. Res. Ocean*, 117, C02014, doi:10.1029/2011JC007528, 2012.
- Yu, L. and Weller, R. A.: Objectively Analyzed air–sea heat Fluxes (OAFlux) for the global oceans, *B. Am. Meteorol. Soc.* 88, 527–539, 2007.
- 690 Yuan, D., Qiao, F., and Su, J.: Cross-shelf penetrating fronts off the southeast coast of China observed by MODIS. *Geophys. Res. Lett.*, 32, L19603, doi:10.1029/2005GL023815, 2005.
- Zeng, D. Y., Ni, X., and Huang, D.: Temporal and spatial variability of the Zhe-Min Coastal Current and the Taiwan Warm Current in winter in the southern Zhejiang coastal sea, *Sci. Sin. Terrae.*, 42, 1123–1134, 2012.
- 695 Zhao, L. and Guo, X.: Influence of cross-shelf water transport on nutrients and phytoplankton in the East China Sea: A model study, *Ocean Sci.*, 7, 27–43, doi:10.5194/os-7-27-2011, 2011.
- Zhou, F., Xue, H., Huang, D., Xuan, J., Ni, X., Xiu, P., and Hao, Q.: Cross shelf exchange in the shelf of

the East China Sea, *J. Geophys. Res. Oceans*, 120, 1545–1572, doi:10.1002/2014JC010567, 2015.  
700 Zhu, J., Chen, C., Ding, P., Li, C., and Lin, H.: Does the Taiwan Warm Current exist in winter?, *Geophys. Res. Lett.*, 31, L12302, doi:10.1029/2004GL019997, 2004.

### Table Captions

Table 1: Annual-mean volume transports ( $S_v = 10^6 \text{ m}^3/\text{s}$ ) through various sections. The sections are shown in Figure 2 using blue dashed lines.

705

### Figure Captions

Figure 1: Density ( $\sigma_t$ ,  $\text{kg}/\text{m}^3$ ) distributions at 50 m depth derived the GDEM climatological data in February (a), an ocean survey from Feb. 1–27, 2007 (b), and an ocean survey from Feb. 3–16, 2007 (c), with the density anomalies between the GDEM data and the two surveys (d and e). The two blue arrows  
710 indicate the two TWC branches in winter. The 30, 50, 70, 100 and 200 m isobaths are indicated with grey lines in panel a.

Figure 2: The FVCOM model grid (Left) and the surface mean flow in the ECS in winter (Right). The colors in the left panel show the grid length (km). The letters a, b, and c indicate the three open boundaries  
715 at the Taiwan Strait, the northwest Pacific Ocean, and the Japan/East Sea, respectively. The blue dashed lines show some important straits around shelf boundary, including the Taiwan Strait (TWS), the East Taiwan Channel (ET), the Tsushima Strait (TUS), the Tokara Strait (TOS), and shelf break at the 200 m isobath. The red rectangle shows the study area of the wintertime TWC. The four red numbers off the Zhe-Min coast shows the four mooring sites observed from Jan. 5 to Feb. 28, 2009.

720

Figure 3: Validations of the wintertime TWC (warm color) along the section off the Zhe-Min coast (the short line with four red numbers in Figure 2): (a) observed alongshore currents; (b) simulated alongshore

currents; (c) observed cross-shore currents; (b) simulated cross-shore currents.

725 Figure 4: Validations of the wintertime TWC fluctuations: (a) observed alongshore currents; (b) simulated alongshore currents; (c) observed cross-shore currents; (d) simulated cross-shore currents. The observation data comes from Station 4 in Figure 1 and the simulated data has the same position and period as the observation data.

730 Figure 5: a) Distribution of flow axes in the ECS in winter. The black arrows show the maximum velocity (m/s) in the vertical profile (VMV) and the color shows the speed of the VMV. The two blue arrows with label IB and OB represent the flow axes of the inshore branch and offshore branch, respectively. The red line DL1 represents the dividing line between the coastal current and inshore branch, and the red line DL2 separates the two TWC branches. b) Depth (m) of flow axes in the ECS. Sections S1–S6 were  
735 selected to study the wintertime TWC. c) Flux of inshore branch (blue) and offshore branch (red) at different latitudes. Dashed lines show the positions of Sections. S1–S6. Note, the scale is not linear.

Figure 6: Distributions of current speed along the six sections S1–S6 in winter. The blue arrow on the left indicates the inshore branch according to the velocity cores from section S3 to S6. The blue arrow  
740 on the right indicates the offshore branch according to the velocity cores from section S2 to S6. TSC is the Taiwan Strait Warm Current.

Figure 7: Current standard deviation in the layer of the VMV. The color shading shows the magnitude of the current standard deviation. The two blue arrows indicate the two TWC branches. The red curve

745 indicate the area where the current standard deviation is larger than 0.1 m/s and their representative points  
(P1 and P2) are selected for later analysis.

Figure 8: Variation of alongshore currents (m/s) for the entire water column north of Taiwan (P1) and in  
the inshore area (P2) and their relation with upper mixed layer depth. The positive velocity (warm color)  
750 indicates the occurrence of the TWC. The gray solid lines show the depth of the upper mixed layer.

Figure 9: The spatial pattern of the first (EOF1; left) and second (EOF2; right) leading modes of the  
VMV in the ECS: (a) EOF1 currents, (b) EOF2 currents, (c) EOF1 alongshore component, (d) EOF2  
alongshore component, (e) EOF1 cross-shore component, and (f) EOF2 cross-shore component.

755

Figure 10: Temporal variation of EOF1, north-south component of wind speed, surface net heat flux, and  
TSC flux along the TWS section, and Kuroshio flux along the ET section. Their linear correlation  
coefficients  $R$  and time-lags are also indicated in each panel. The  $p$  value is a declining indicator which  
indicates the impact significance of the linear correlation coefficients  $R$  whereby  $R$  has statistical  
760 significance and the confidence level is larger than 95% when the  $p$  value is less than 0.05.

Figure 11: Temporal variation of EOF2, north-south component of wind speed, surface net heat flux, and  
TSC flux along the TWS section, and Kuroshio flux along the ET section. Their linear correlation  
coefficients and time-lags are also indicated in each panel.

765

Figure 12: The effects of Coriolis force (a), total pressure (b), surface friction (c), bottom friction (d),



advection (e), and local acceleration (f) for water column in winter according to Eq. (5) (units:  $10^{-4}$   $m^2/s^2$ ). The two blue arrows indicate the two TWC branches. The two triangles indicate the two regions with significant fluctuation north of Taiwan (P1) and in the inshore area (P2).

770

Figure 13: Variations in Coriolis force, total pressure, and wind in the alongshore direction at P1 (a), the cross-shore direction at P1 (b), the alongshore direction at P2 (c), and the cross-shore direction at P2 (d) according to Eq. (5).

775 Figure 14: Traces of TSC water (a) and Kuroshio water (b) in winter, with the variation of surface currents at the original location of P1 (c). The black dots represent the release locations of tracers. The gray lines show the entire trajectories of the tracers. The red lines and blue lines are selected trajectories, which are close to the inshore branch and offshore branch, respectively. The dates show the times that selected tracers reached the origin location P1; note that the location of P1 is not fixed but varies with time. The  
780 numbers are the depths of the tracers, which are labeled at an interval of six days. The two black arrows represent the two TWC branches.

Figure 15: The VMV under the northerly wind (a) and southerly wind (b). Panel (c) shows the variation of wind in winter. Blue vectors and red vectors show the southwestward coastal current and the  
785 northeastward TWC, respectively. Gray contours indicate the 30, 50, 70, and 100 m isobaths. The two black arrows represent the two TWC branches. The green ellipse indicates the inshore area with significant fluctuation.

Table 1: Annual-mean volume transports ( $S_v = 10^6 \text{ m}^3/\text{s}$ ) through various sections. The sections are

790 shown in Figure 2 using blue dashed lines.

| Section                    | Present model | Previous estimates           |
|----------------------------|---------------|------------------------------|
| <b>Taiwan Strait</b>       | 1.22          | 1.2 (Isobe, 2008)            |
|                            |               | 1.8 (Wang et al., 2003)      |
|                            |               | 1.09 (Wu and Hsin, 2005)     |
|                            |               | 1.03 (Yang et al., 2011)     |
|                            |               | 1.72 (Guo et al., 2006)      |
|                            |               | 0.5 (Hung et al., 2003)      |
|                            |               | 1.10 (Liu et al., 2014b)     |
| <b>Tsushima Strait</b>     | 2.85          | 2.65 (Isobe, 2008)           |
|                            |               | 3.03 (Guo et al., 2006)      |
|                            |               | 2.70 (Yang et al., 2011)     |
|                            |               | 2.52 (Liu et al., 2014b)     |
| <b>200m isobath</b>        | 1.66          | 1.46 (Guo et al., 2006)      |
|                            |               | 0.87 (Liu et al., 2014a)     |
|                            |               | 3.0 (Teague et al., 2003)    |
|                            |               | 2.74 (Lee and Matsuno, 2007) |
| <b>East Taiwan Channel</b> | 22.71         | 21.50 (Johns et al., 2001)   |
|                            |               | 23.00 (Teague et al., 2003)  |
|                            |               | 23.83 (Guo et al., 2006)     |
|                            |               | 28.4 (Hsin et al., 2013)     |
|                            |               | 21.37 (Yang et al., 2011)    |
|                            |               | 20.74 (Liu et al., 2014b)    |
| <b>Tokara Strait</b>       | 23.20         | 23.4 (Feng et al., 2000)     |
|                            |               | 20.00 (Teague et al., 2003)  |
|                            |               | 20.66 (Yang et al., 2011)    |
|                            |               | 24.42 (Liu et al., 2014b)    |

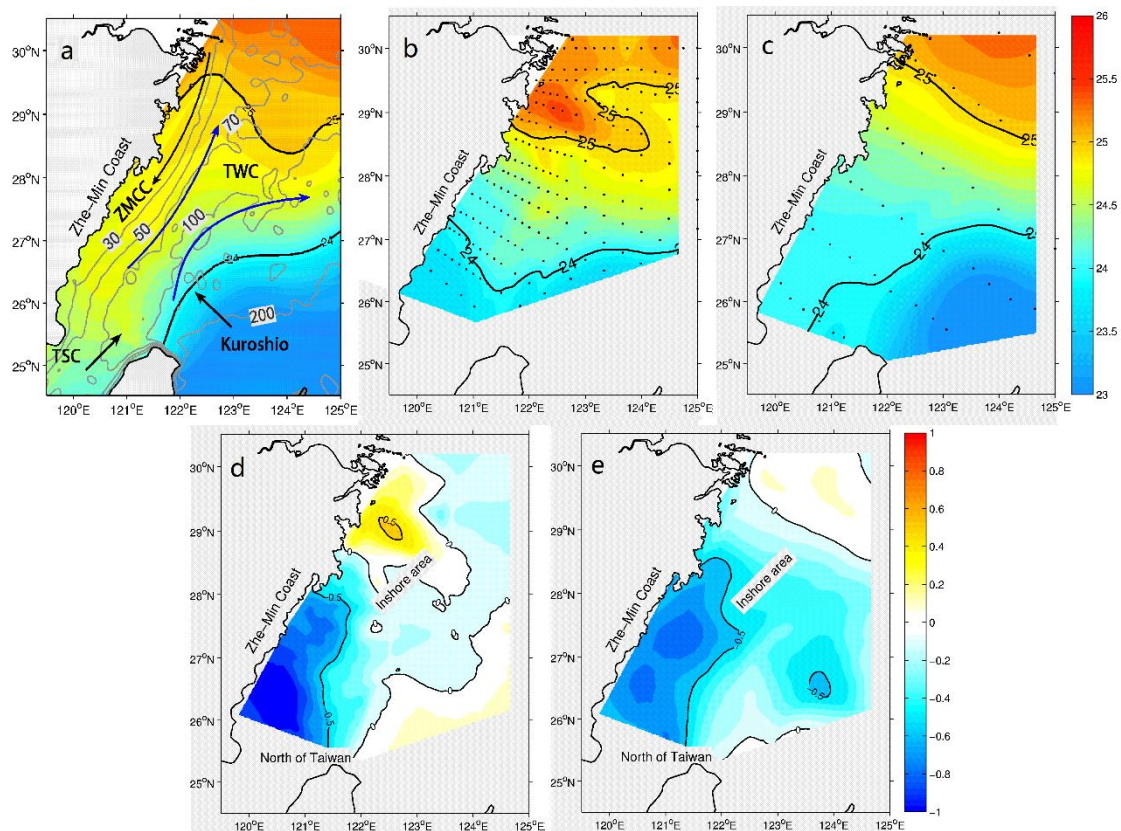

795 Figure 1: Density ( $\sigma_t$ ,  $\text{kg/m}^3$ ) distributions at 50 m depth derived the GDEM climatological data in February (a), an ocean survey from Feb. 1–27, 2007 (b), and an ocean survey from Feb. 3–16, 2007 (c), with the density anomalies between the GDEM data and the two surveys (d and e). The two blue arrows indicate the two TWC branches in winter. The 30, 50, 70, 100 and 200 m isobaths are indicated with grey lines in panel a.

800

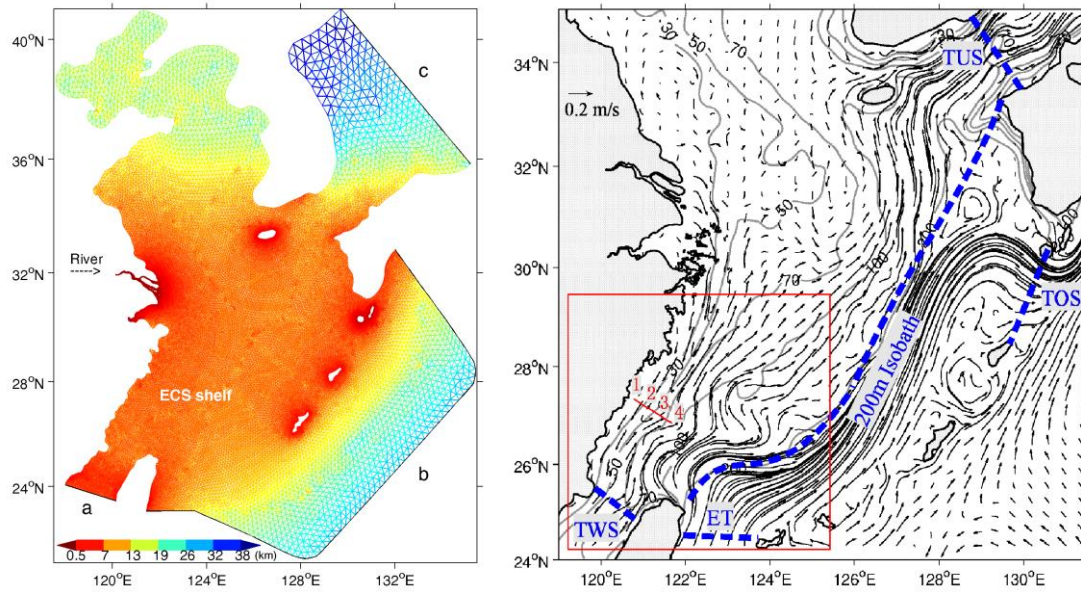

Figure 2: The FVCOM model grid (Left) and the surface mean flow in the ECS in winter (Right). The colors in the left panel show the grid length (km). The letters a, b, and c indicate the three open boundaries at the Taiwan Strait, the northwest Pacific Ocean, and the Japan/East Sea, respectively. The blue dashed

805 lines show some important straits around shelf boundary, including the Taiwan Strait (TWS), the East Taiwan Channel (ET), the Tsushima Strait (TUS), the Tokara Strait (TOS), and shelf break at the 200 m isobath. The red rectangle shows the study area of the wintertime TWC. The four red numbers off the Zhe-Min coast shows the four mooring sites observed from Jan. 5 to Feb. 28, 2009.

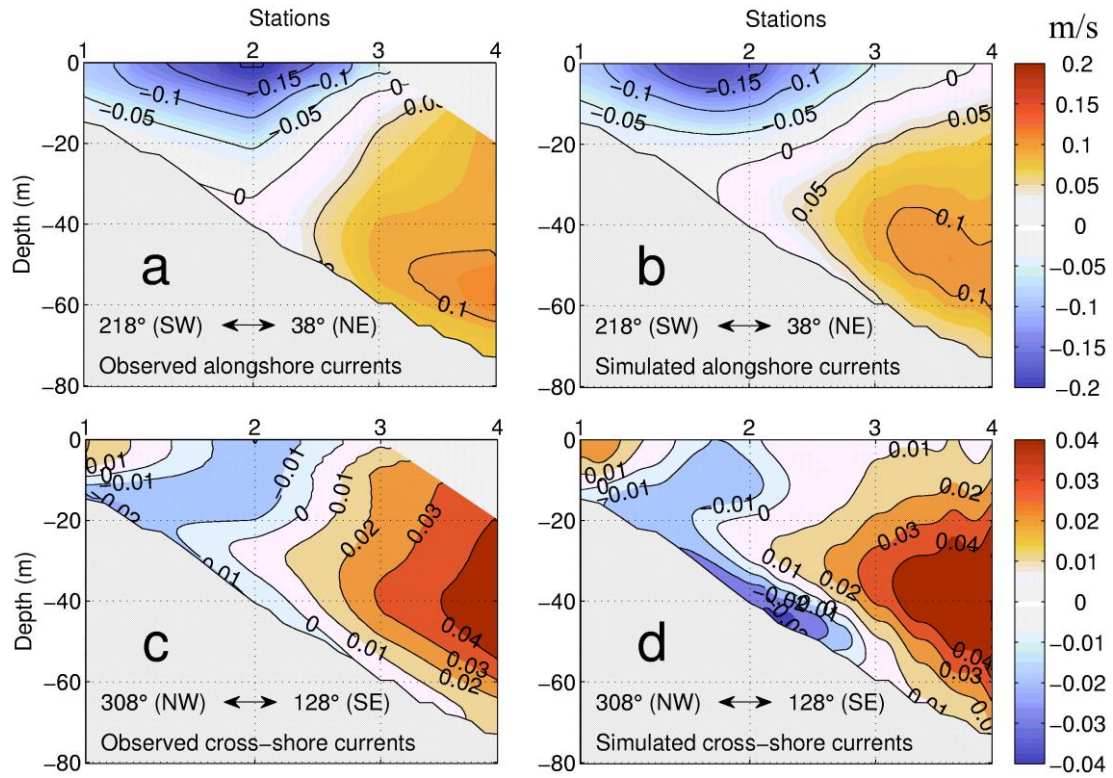

810

Figure 3: Validations of the wintertime TWC (warm color) along the section off the Zhe-Min coast (the short line with four red numbers in Figure 2): (a) observed alongshore currents; (b) simulated alongshore currents; (c) observed cross-shore currents; (d) simulated cross-shore currents.



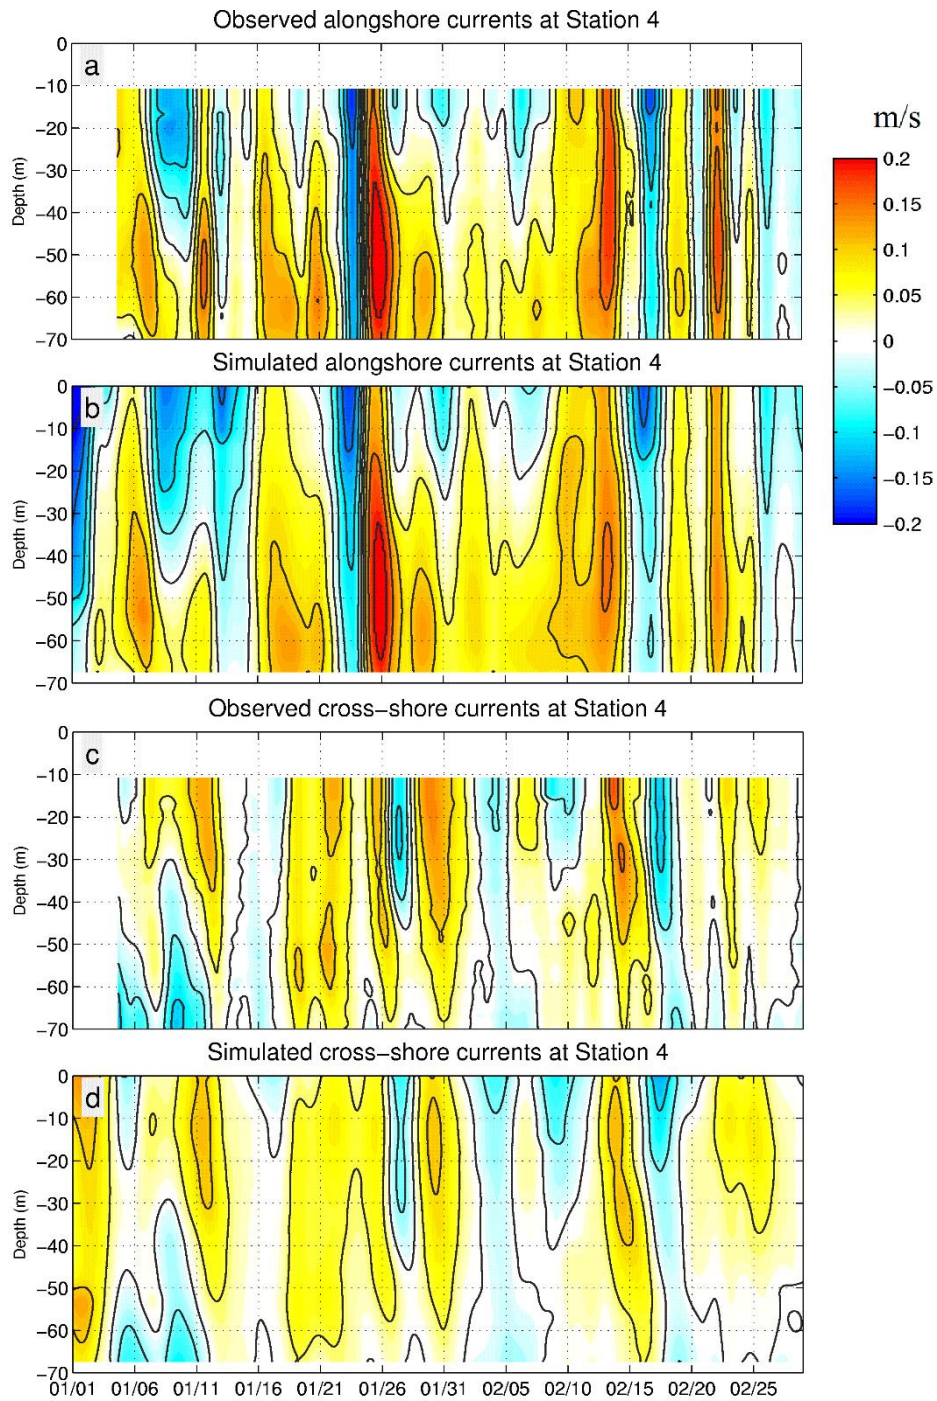

815

Figure 4: Validations of the wintertime TWC fluctuations: (a) observed alongshore currents; (b) simulated alongshore currents; (c) observed cross-shore currents; (d) simulated cross-shore currents. The observation data comes from Station 4 in Figure 1 and the simulated data has the same position and period as the observation data.

820

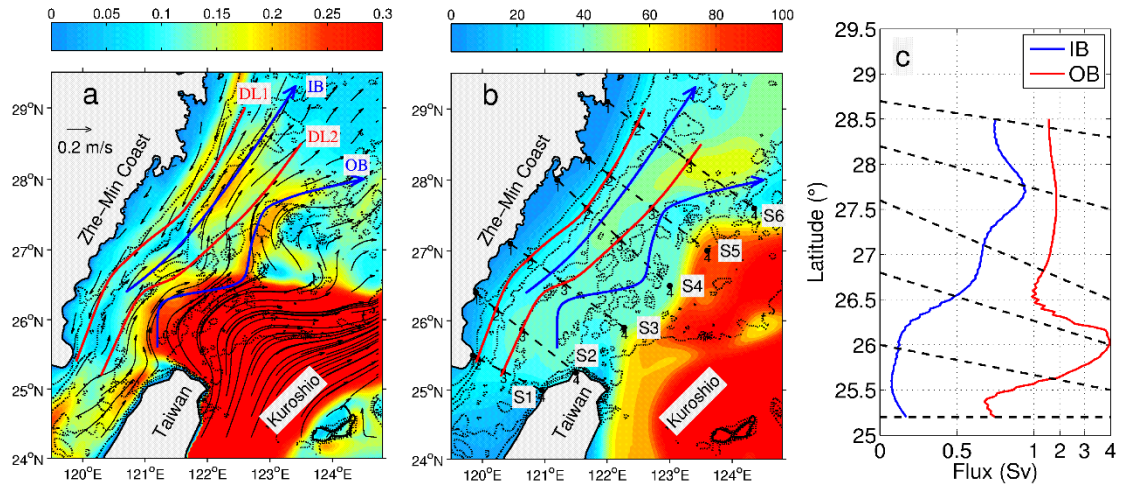

Figure 5: a) Distribution of flow axes in the ECS in winter. The black arrows show the maximum velocity (m/s) in the vertical profile (VMV) and the color shows the speed of the VMV. The two blue arrows with label IB and OB represent the flow axes of the inshore branch and offshore branch, respectively. The red line DL1 represents the dividing line between the coastal current and inshore branch, and the red line DL2 separates the two TWC branches. b) Depth (m) of flow axes in the ECS. Sections S1–S6 were selected to study the wintertime TWC. c) Flux of inshore branch (blue) and offshore branch (red) at different latitudes. Dashed lines show the positions of Sections. S1–S6. Note, the scale is not linear.

825

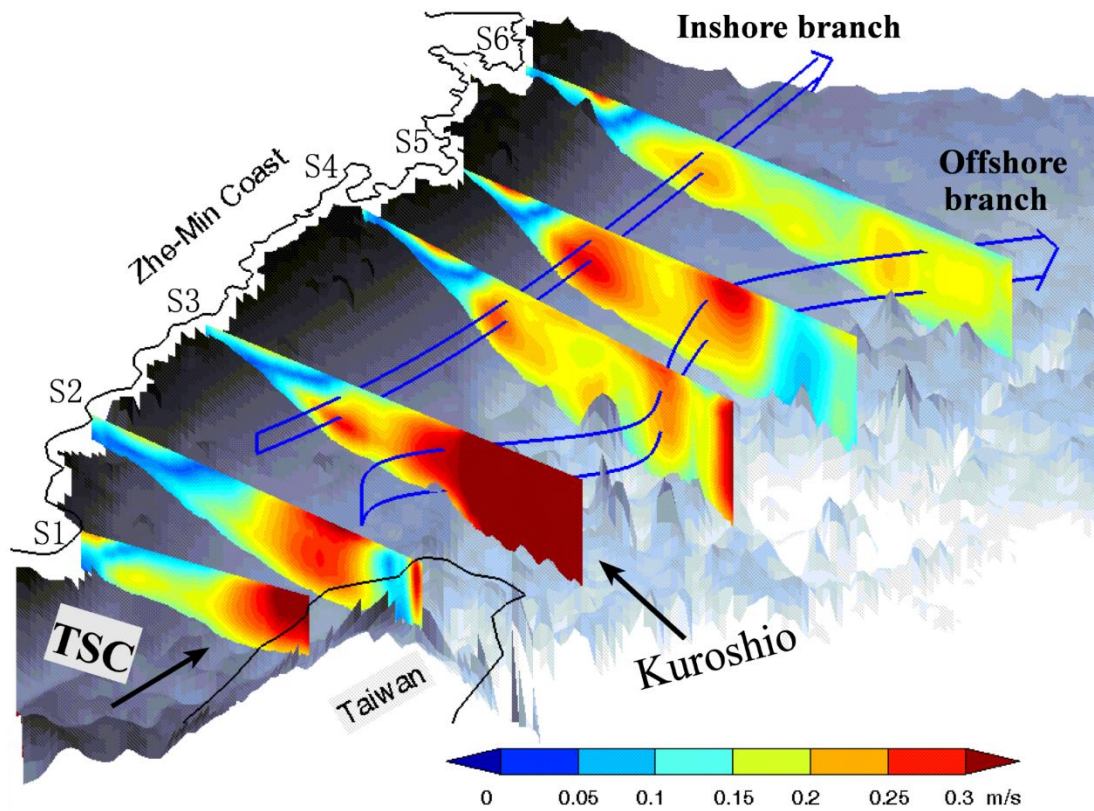

830

Figure 6: Distributions of current speed along the six sections S1–S6 in winter. The blue arrow on the left indicates the inshore branch according to the velocity cores from section S3 to S6. The blue arrow on the right indicates the offshore branch according to the velocity cores from section S2 to S6. TSC is the Taiwan Strait Current.

835



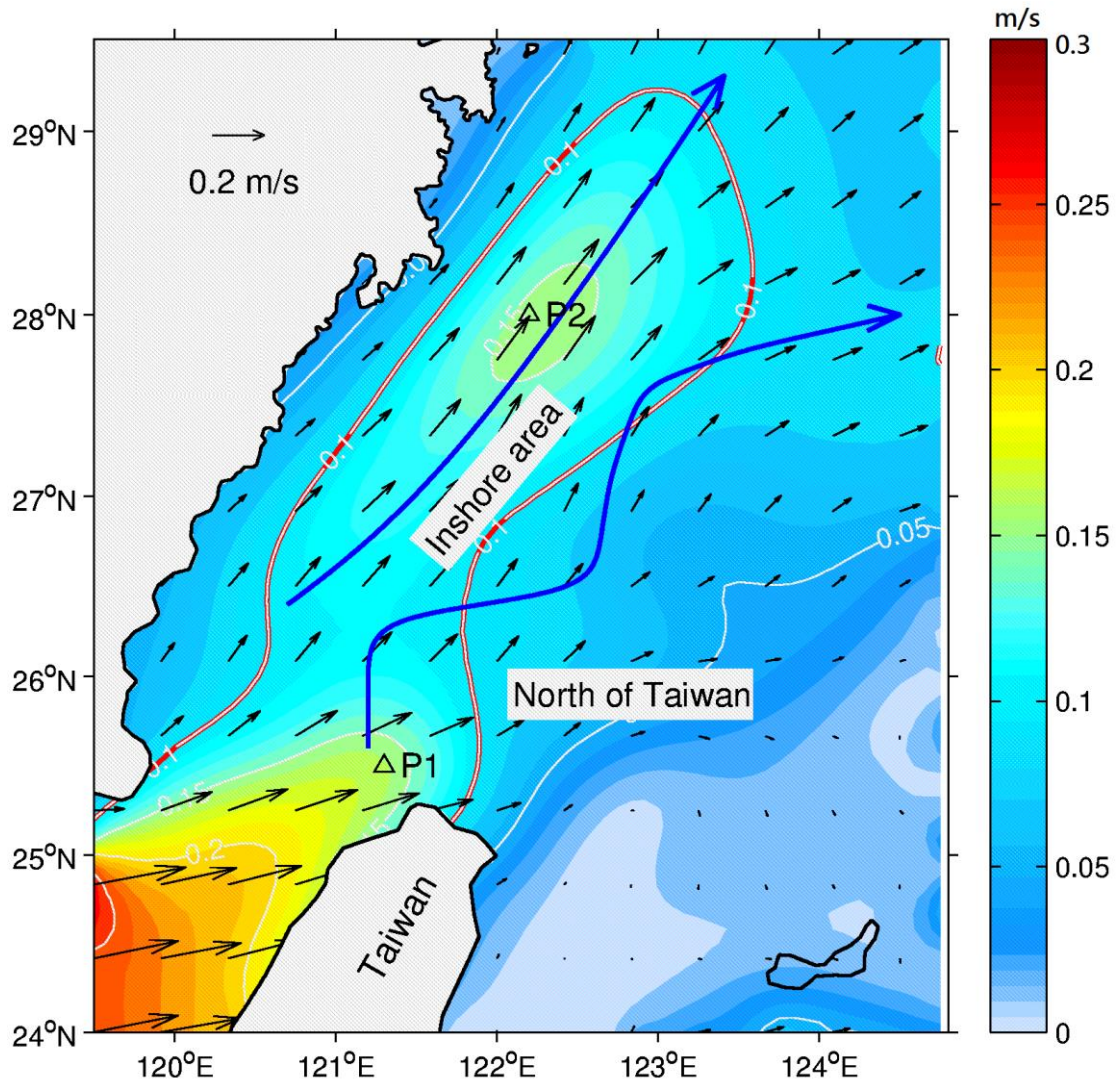

Figure 7: Current standard deviation in the layer of the VMV. The color shading shows the magnitude of the current standard deviation. The two blue arrows indicate the two TWC branches. The red curve indicate the area where the current standard deviation is larger than 0.1 m/s and their representative points

840 (P1 and P2) are selected for later analysis.

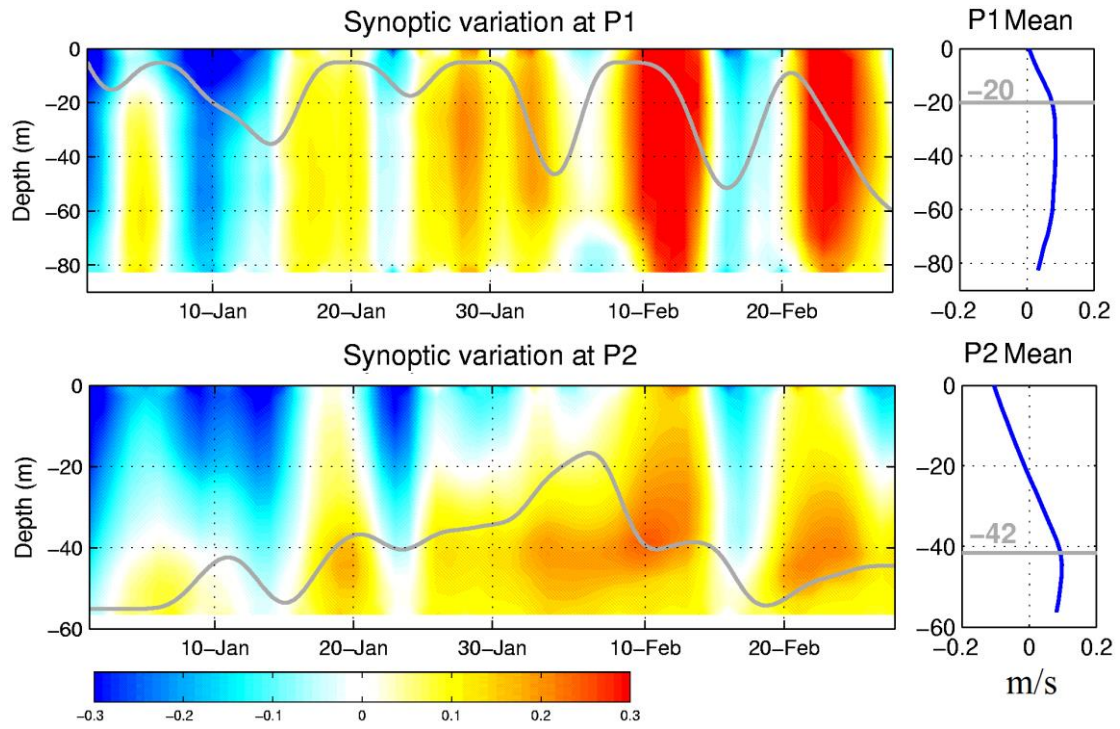

Figure 8: Variation of alongshore currents (m/s) for the entire water column north of Taiwan (P1) and in the inshore area (P2) and their relation with upper mixed layer depth. The positive velocity (warm color) indicates the occurrence of the TWC. The gray solid lines show the depth of the upper mixed layer.

845



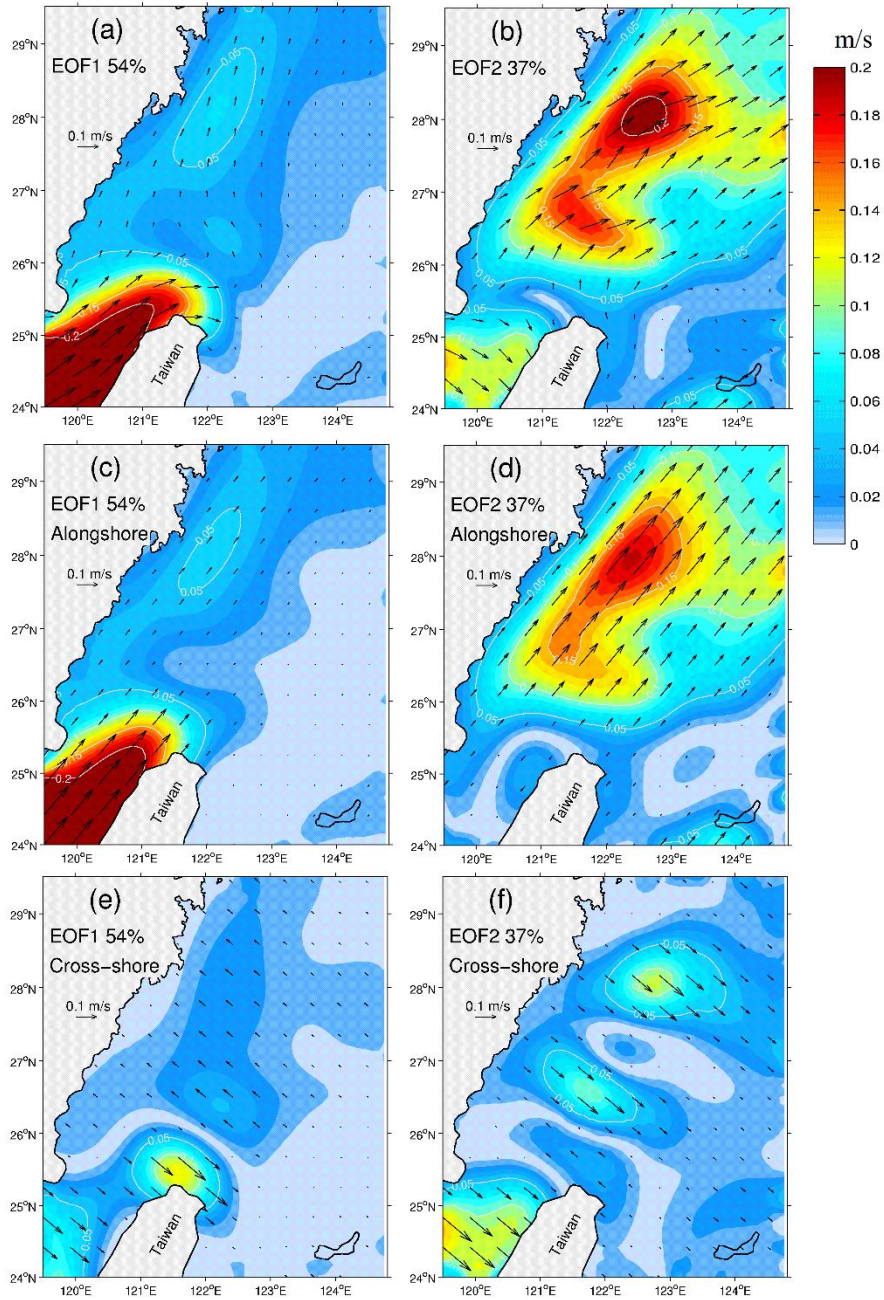

Figure 9: The spatial pattern of the first (EOF1; left) and second (EOF2; right) leading modes of the

VMV in the ECS: (a) EOF1 currents, (b) EOF2 currents, (c) EOF1 alongshore component, (d) EOF2

850 alongshore component, (e) EOF1 cross-shore component, and (f) EOF2 cross-shore component.

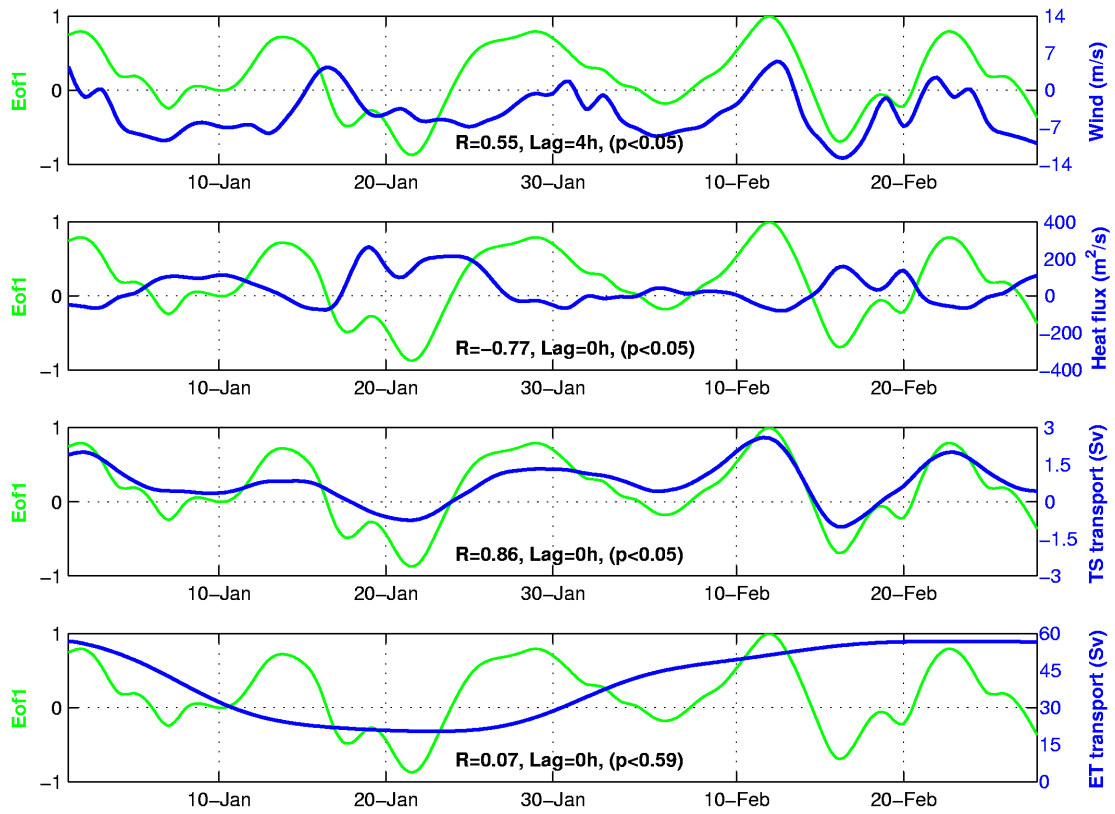

Figure 10: Temporal variation of EOF1, north-south component of wind speed, surface net heat flux, and TSC flux along the TWS section, and Kuroshio flux along the ET section. Their linear correlation coefficients R and time-lags are also indicated in each panel. The p value is a declining indicator which indicates the impact significance of the linear correlation coefficients R whereby R has statistical significance and the confidence level is larger than 95% when the p value is less than 0.05.

855

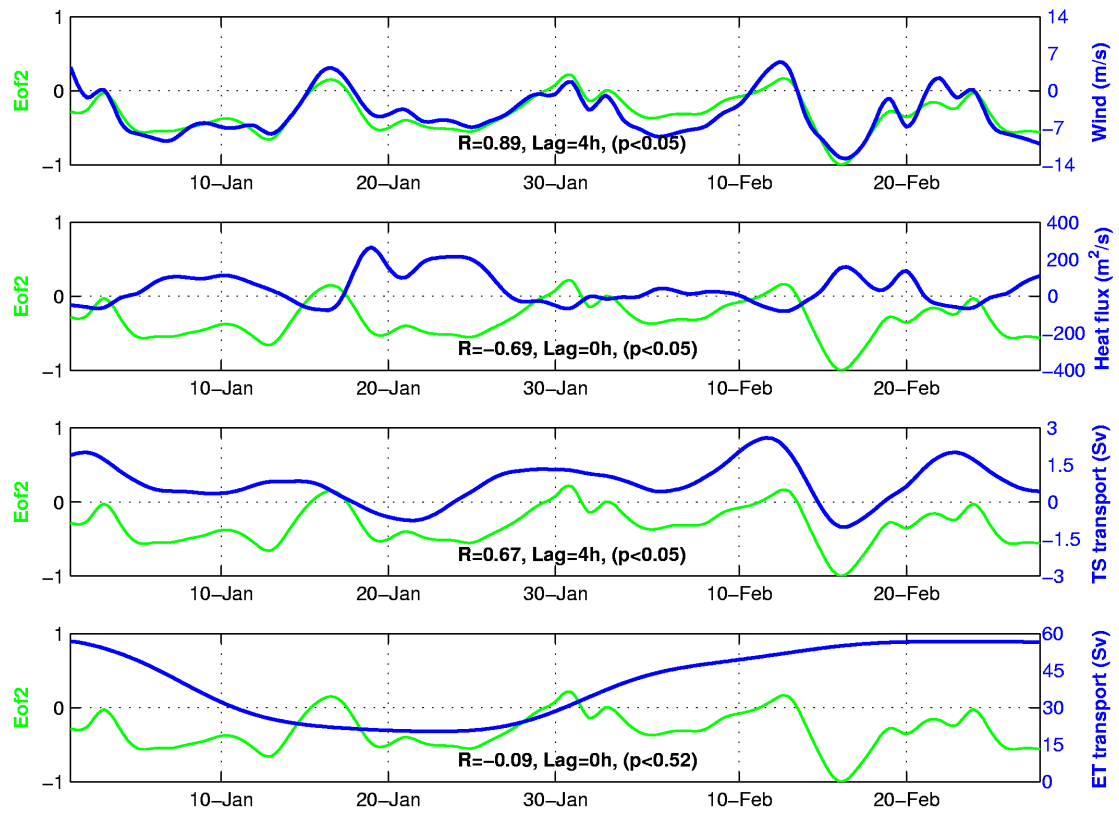

860 Figure 11: Temporal variation of EOF2, north-south component of wind speed, surface net heat flux, and TSC flux along the TWS section, and Kuroshio flux along the ET section. Their linear correlation coefficients and time-lags are also indicated in each panel.



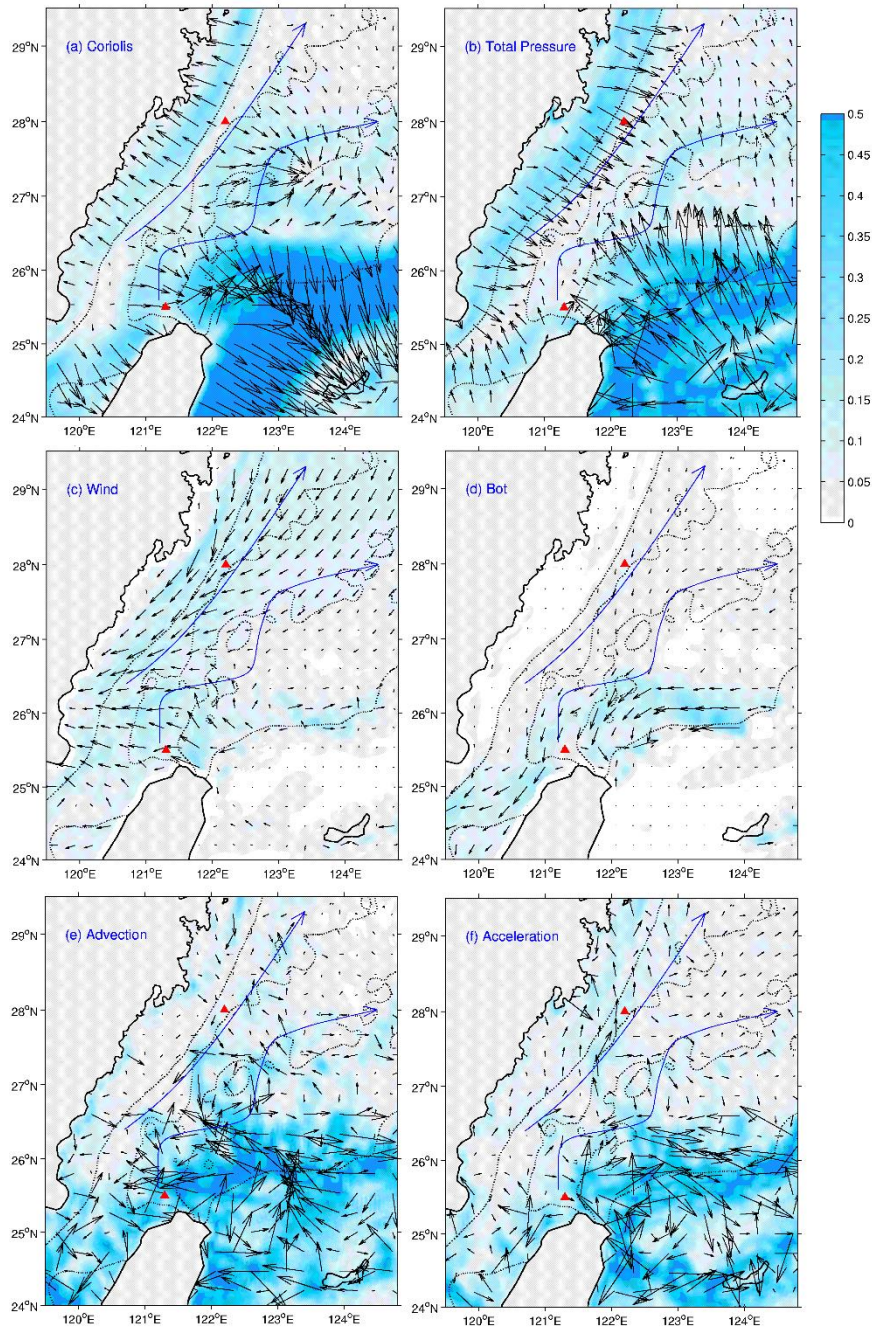

865 Figure 12: The effects of Coriolis force (a), total pressure (b), surface friction (c), bottom friction (d), advection (e), and local acceleration (f) for water column in winter according to Eq. (5) (units:  $10^{-4} \text{ m}^2/\text{s}^2$ ). The two blue arrows indicate the two TWC branches. The two triangles indicate the two regions with significant fluctuation north of Taiwan (P1) and in the inshore area (P2).

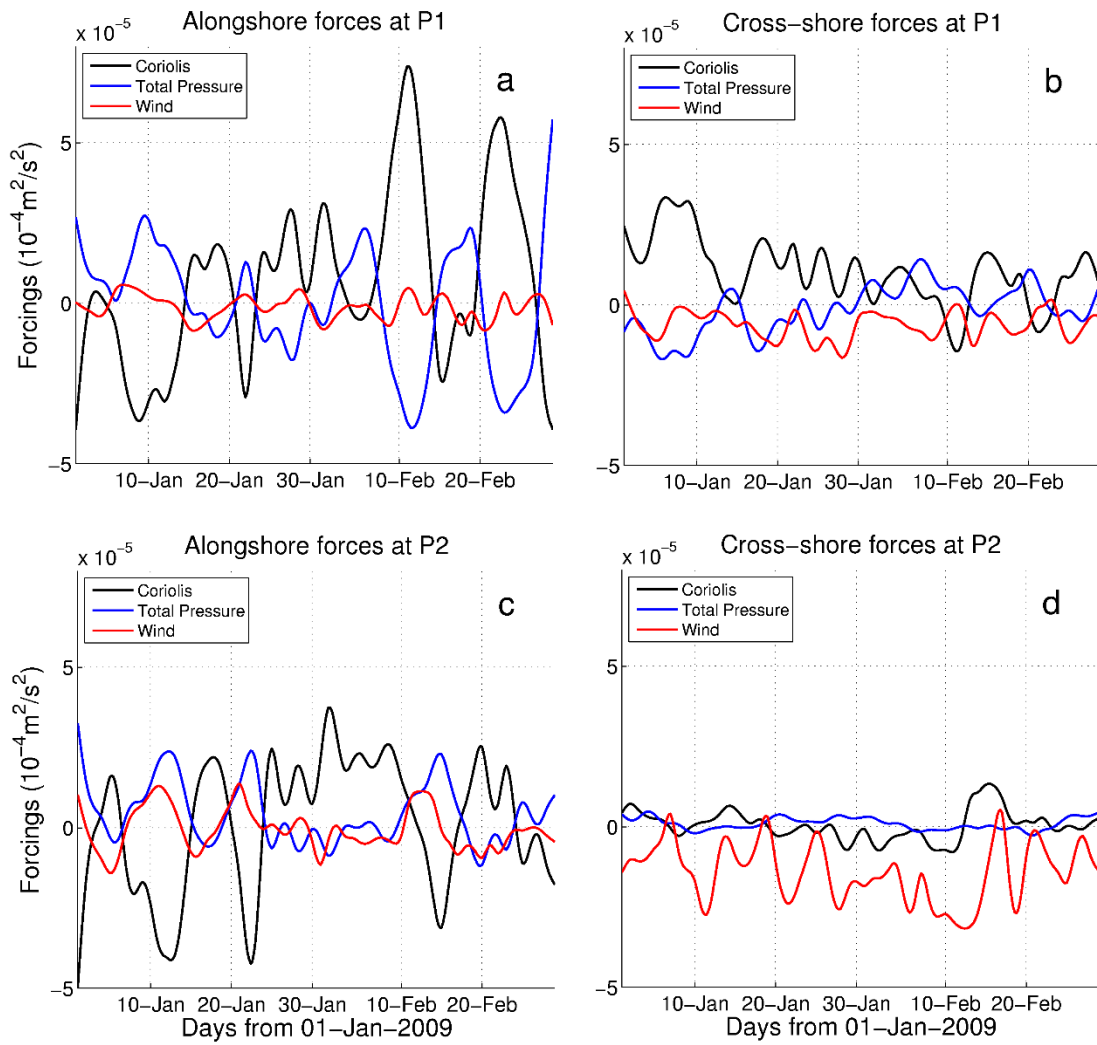

Figure 13: Variations in Coriolis force, total pressure, and wind in the alongshore direction at P1 (a), the cross-shore direction at P1 (b), the alongshore direction at P2 (c), and the cross-shore direction at P2 (d) according to Eq. (5).

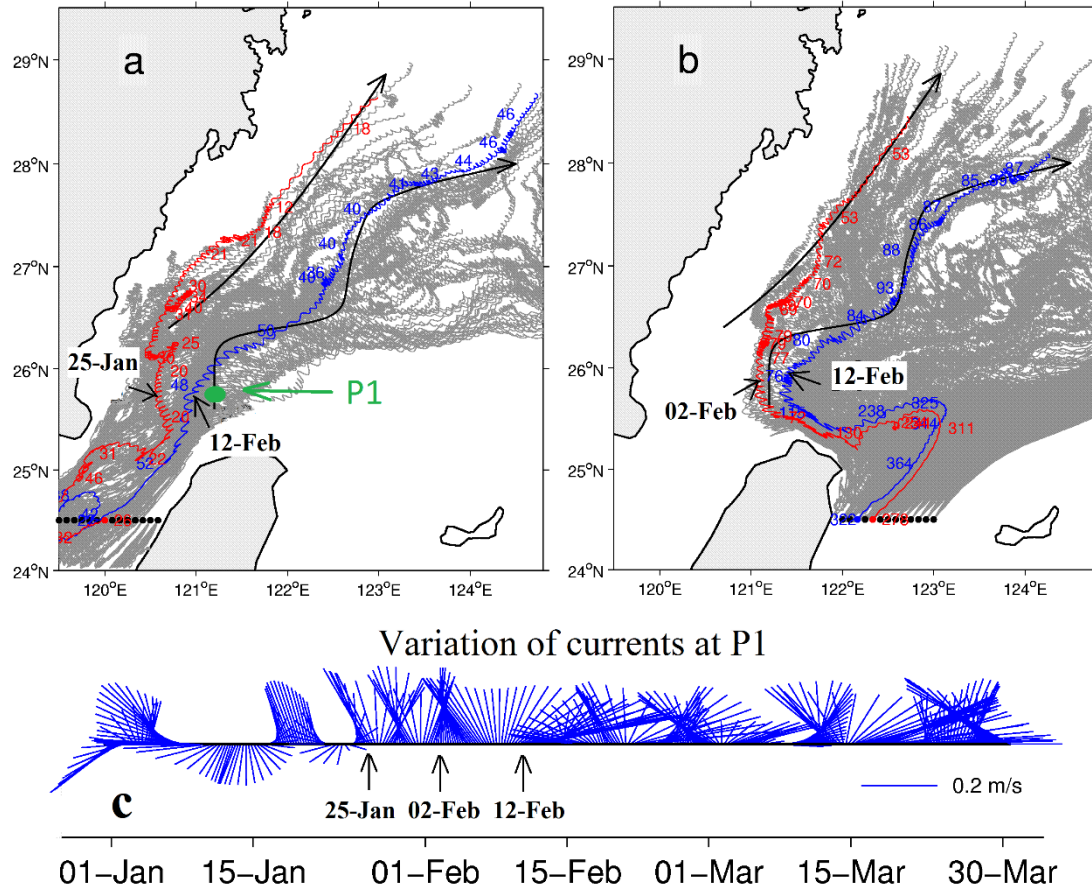

Figure 14: Traces of TSC water (a) and Kuroshio water (b) in winter, with the variation of surface currents at the original location of P1 (c). The black dots represent the release locations of tracers. The gray lines show the entire trajectories of the tracers. The red lines and blue lines are selected trajectories, which are close to the inshore branch and offshore branch, respectively. The dates show the times that selected tracers reached the origin location P1; note that the location of P1 is not fixed but varies with time. The numbers are the depths of the tracers, which are labeled at an interval of six days. The two black arrows represent the two TWC branches.

880



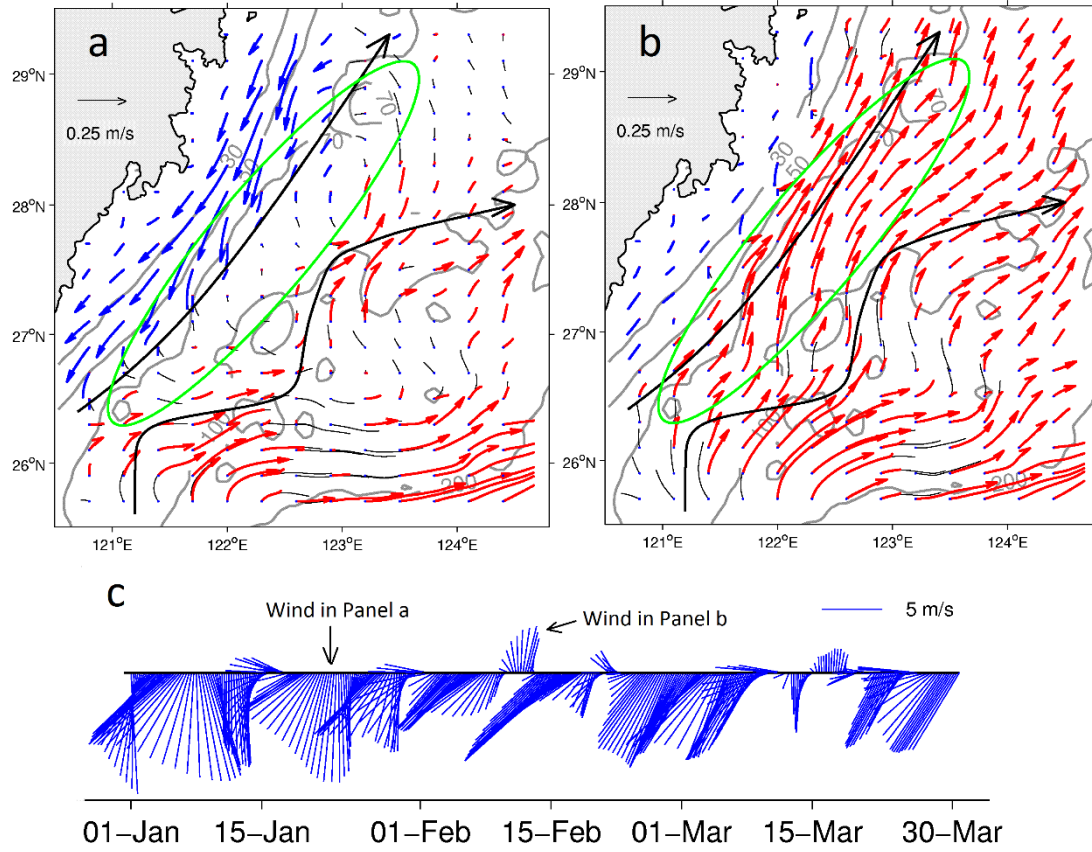

885

Figure 15: The VMV under the northerly wind (a) and southerly wind (b). Panel (c) shows the variation of wind in winter. Blue vectors and red vectors show the southwestward coastal current and the northeastward TWC, respectively. Gray contours indicate the 30, 50, 70, and 100 m isobaths. The two black arrows represent the two TWC branches. The green ellipse indicates the inshore area with

890

significant fluctuation.
